# Supplementary material for: Magnetic nanoparticle-supported phosphine gold(i) complex: a highly efficient and recyclable catalyst for the direct reductive amination of aldehydes and ketones
Source: Royal Society of Chemistry journal article supplement (doi:10.1039/c5cy02159f), 2016-01-01
Supplement: c5cy02159f1.pdf [file c5cy02159f1.pdf]

# Supporting Information

## **Magnetic nanoparticles-supported phosphine gold(I) complex: A highly efficient and recyclable catalyst for the direct reductive amination of aldehydes and ketones**

Weisen Yang,<sup>a,b</sup> Li Wei,<sup>a</sup> Feiyan Yi<sup>a</sup> and Mingzhong Cai<sup>a\*</sup>

<sup>a</sup> *Key Laboratory of Functional Small Organic Molecule, Ministry of Education and College of Chemistry & Chemical Engineering, Jiangxi Normal University, Nanchang 330022, P. R. China*

<sup>b</sup> *College of Ecology and Resources Engineering, Wuyi University, Wuyishan City 354300, P. R. China*  
*mzcaai@jxnu.edu.cn*

**Copies of <sup>1</sup>H NMR, <sup>13</sup>C NMR spectra for compounds 3a–3d'.....S2–S31**

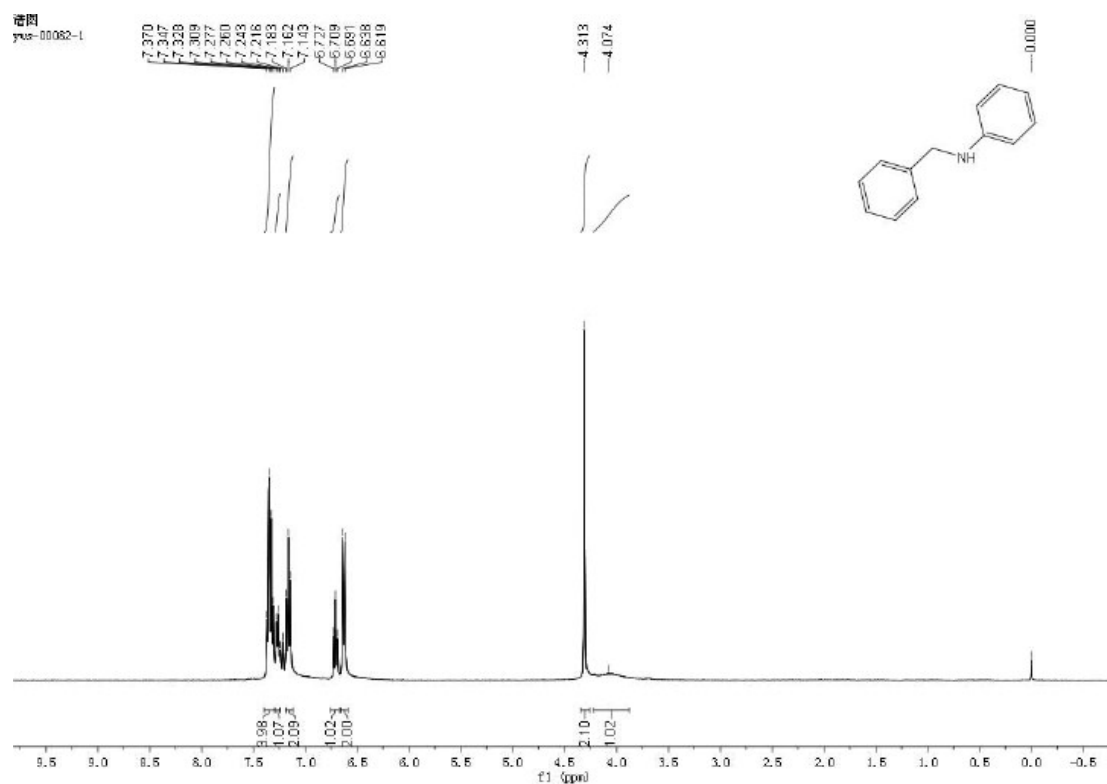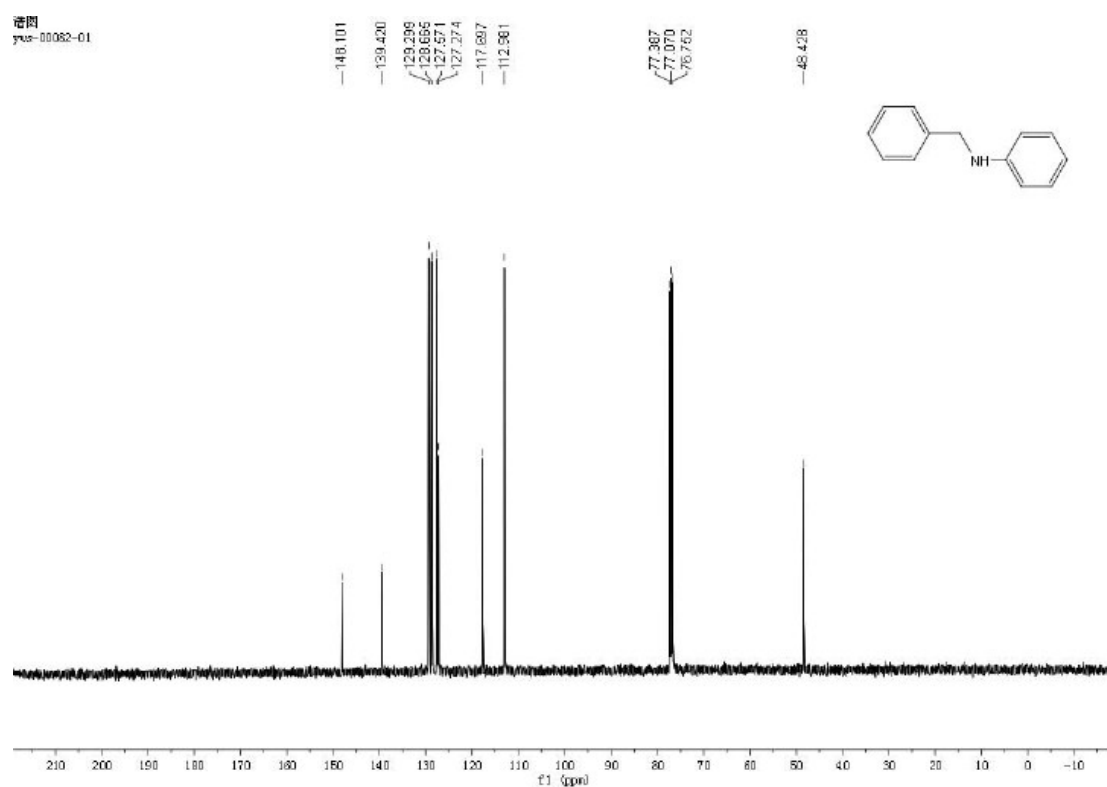

$^1\text{H}$  NMR and  $^{13}\text{C}$  NMR spectra for compound **3a**

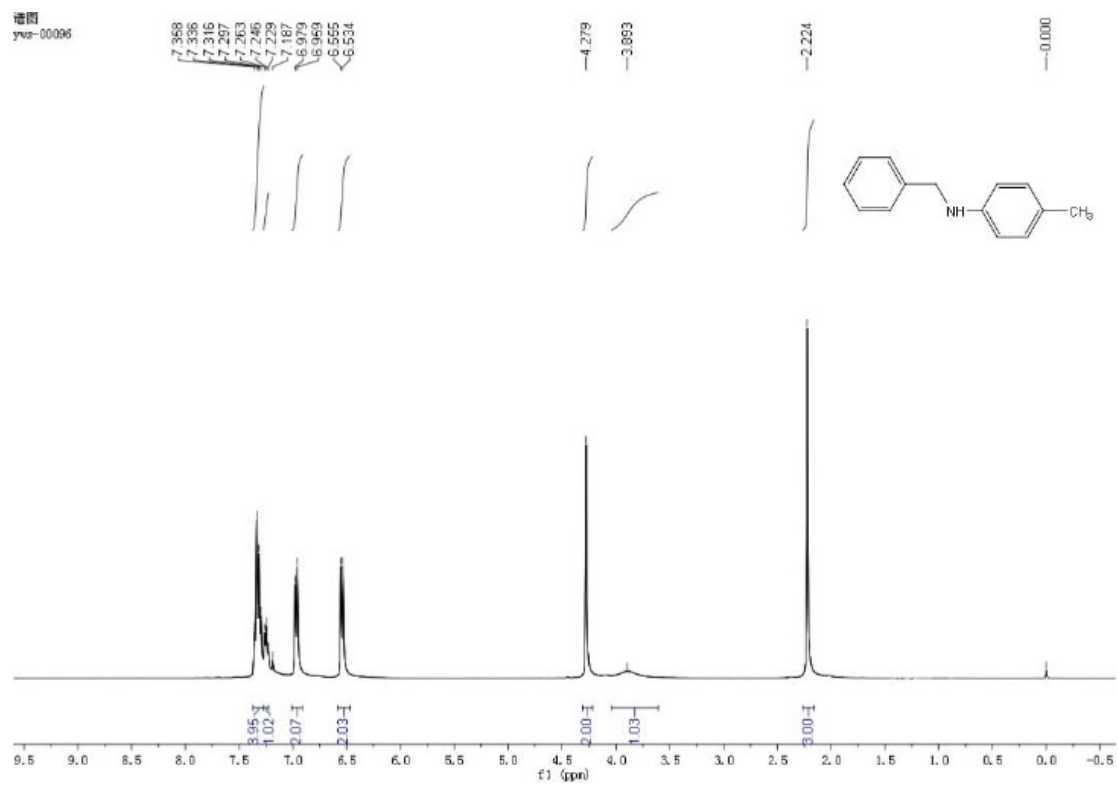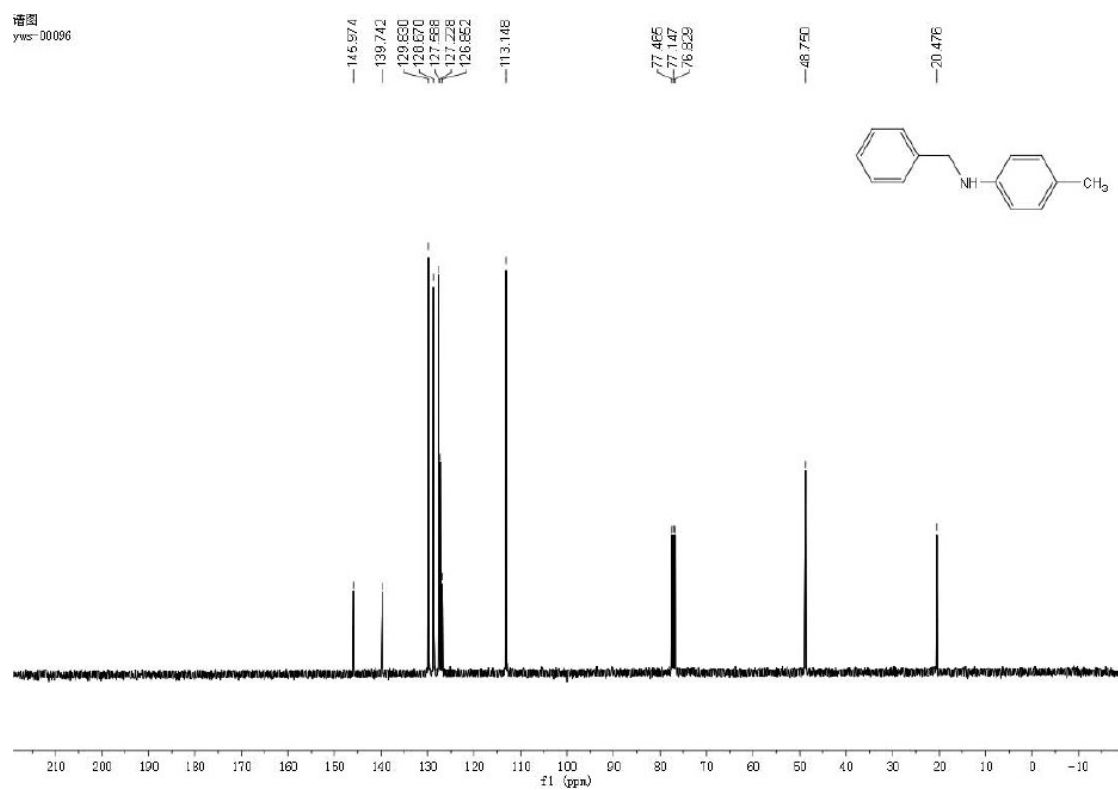

$^1\text{H}$  NMR and  $^{13}\text{C}$  NMR spectra for compound **3b**

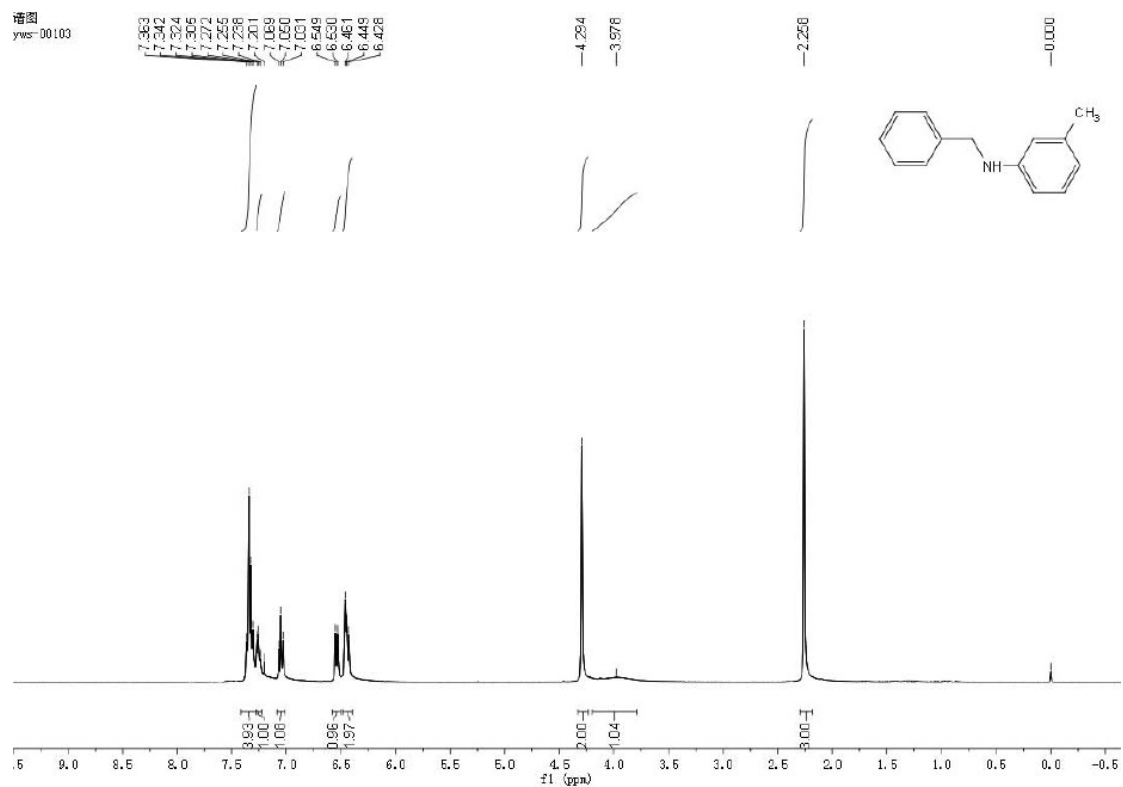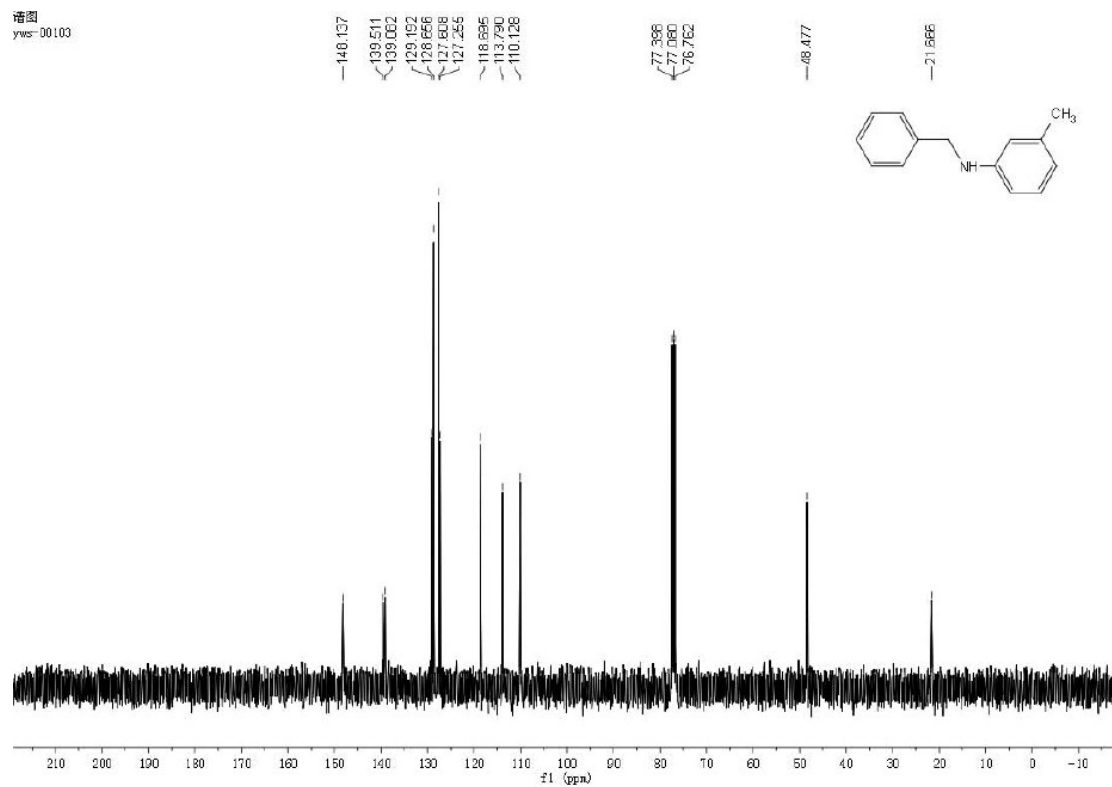

<sup>1</sup>H NMR and <sup>13</sup>C NMR spectra for compound **3c**

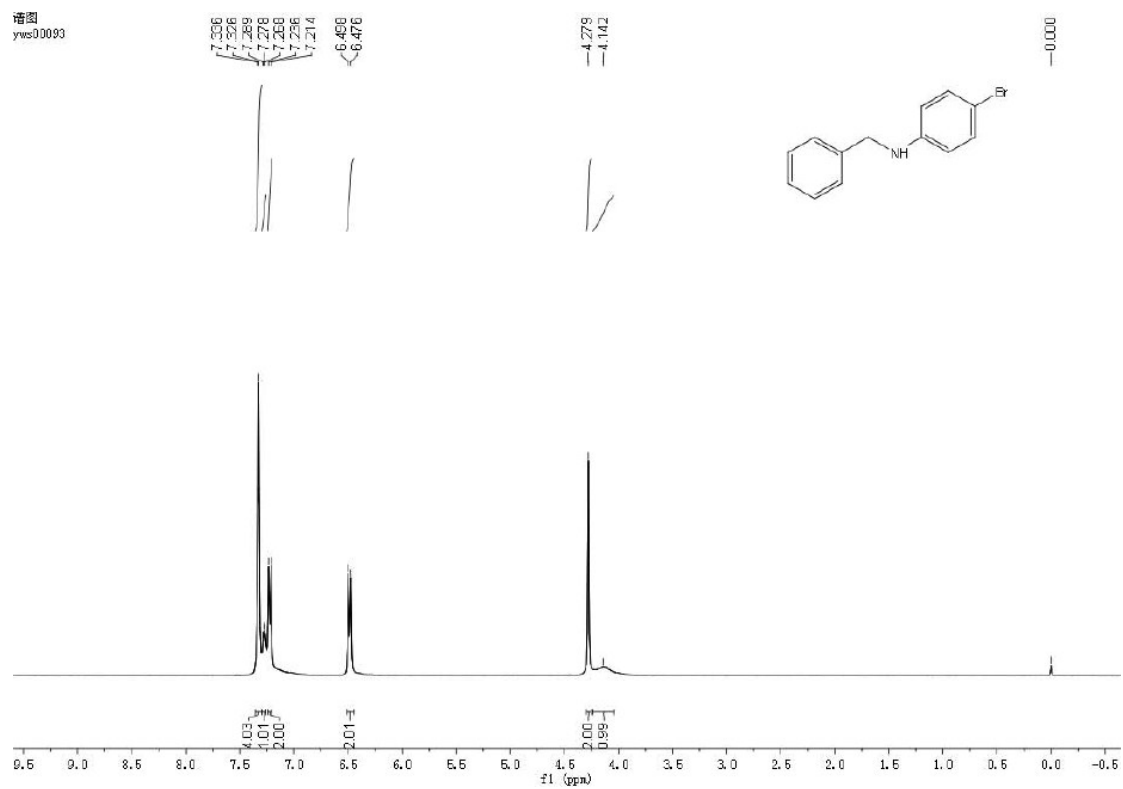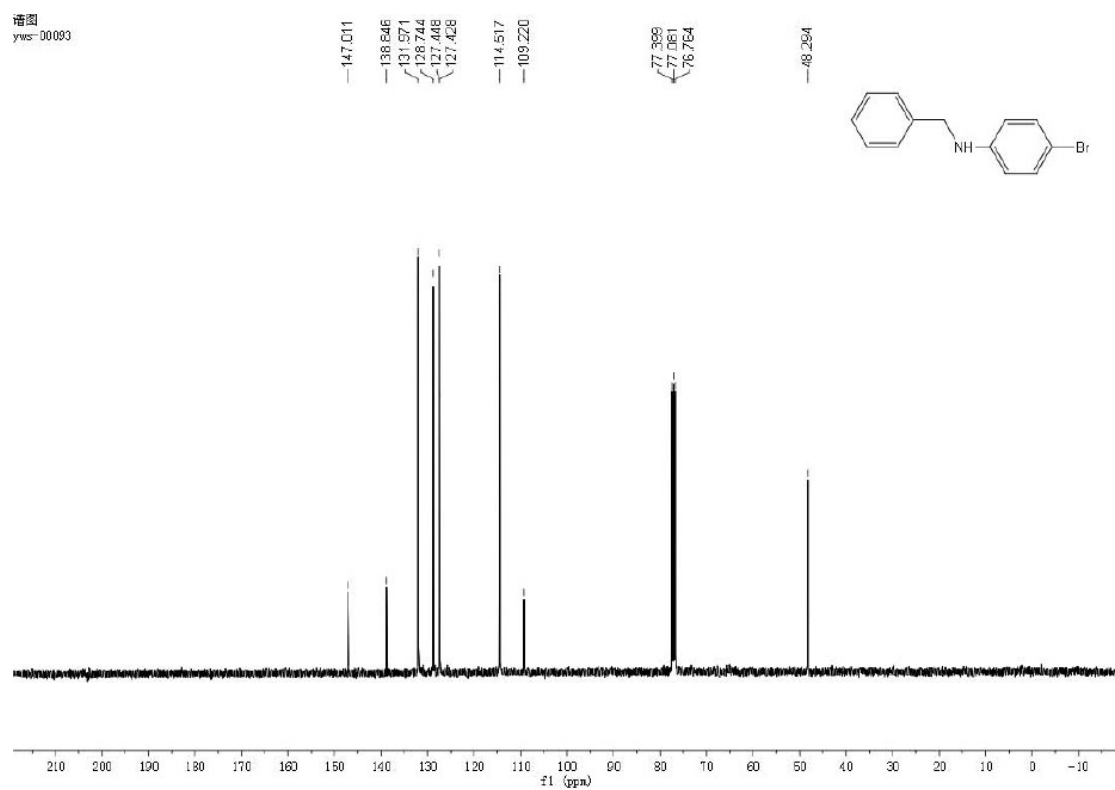

<sup>1</sup>H NMR and <sup>13</sup>C NMR spectra for compound **3d**

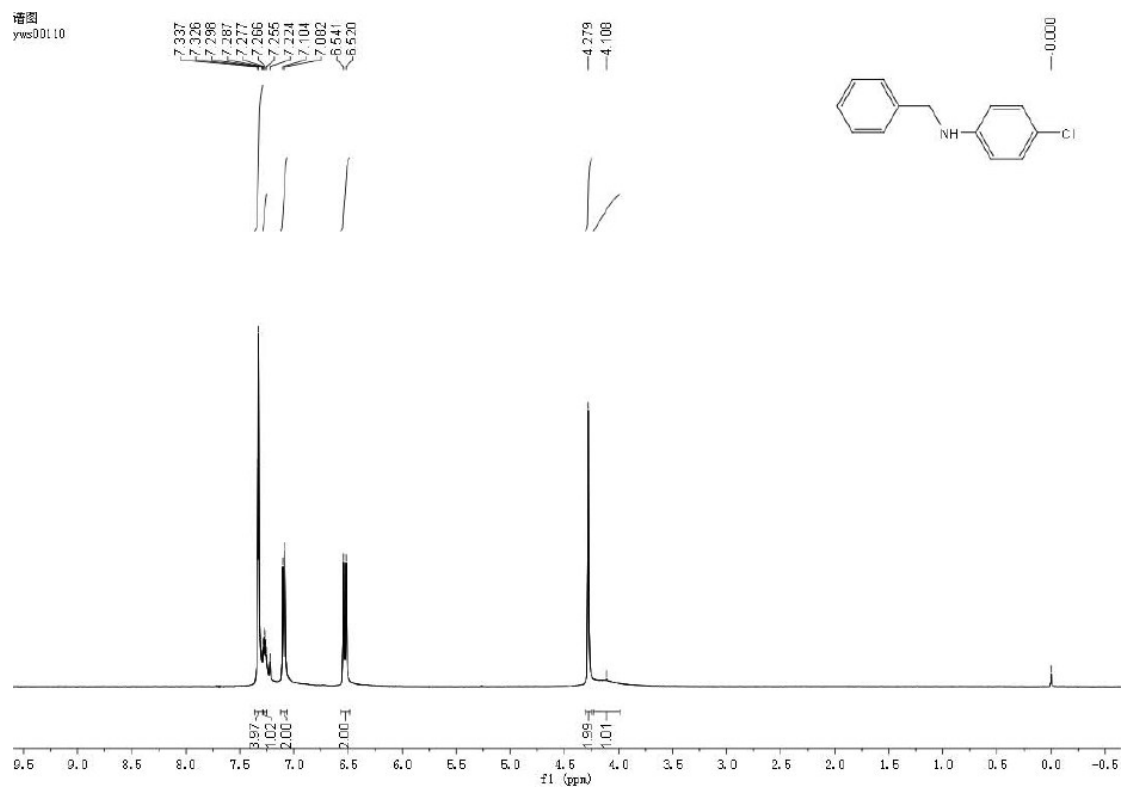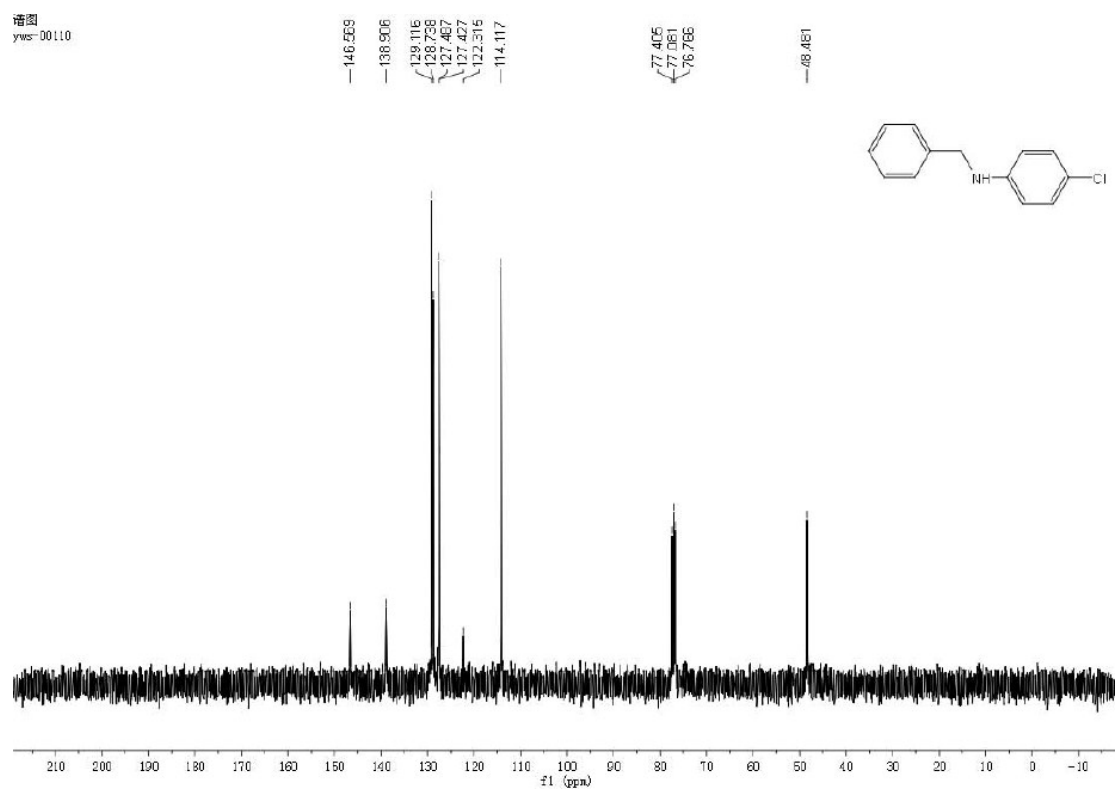

$^1\text{H}$  NMR and  $^{13}\text{C}$  NMR spectra for compound **3e**

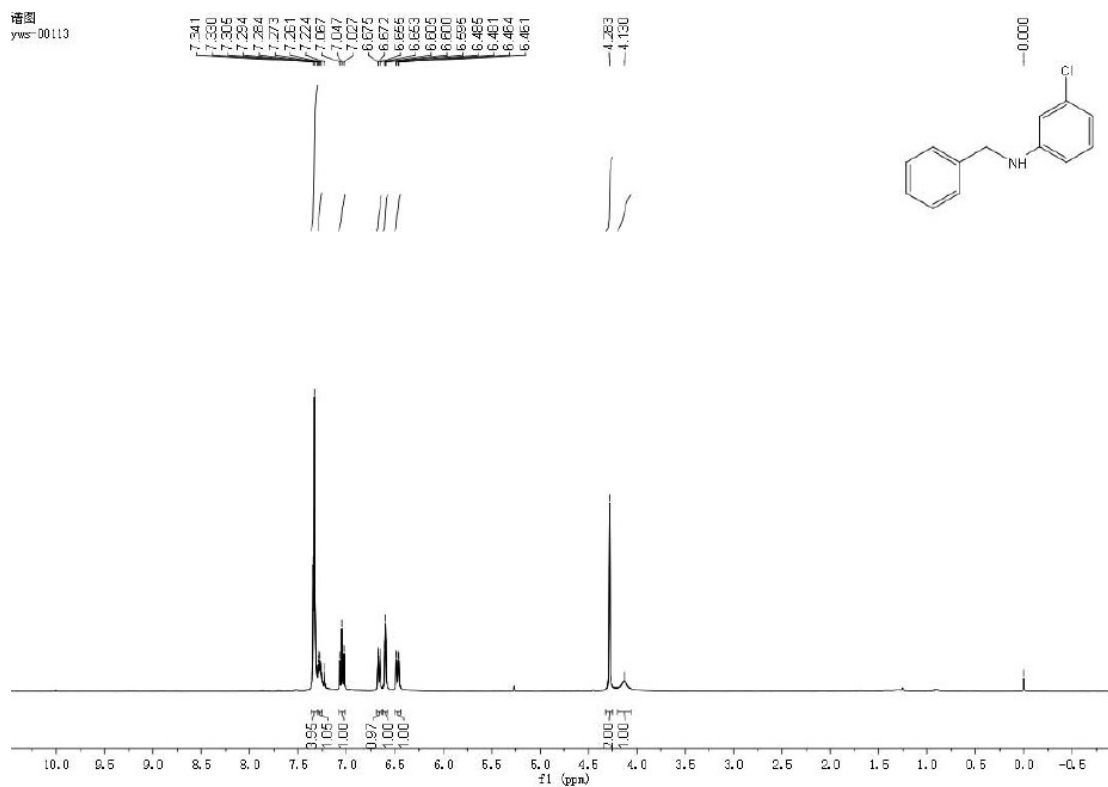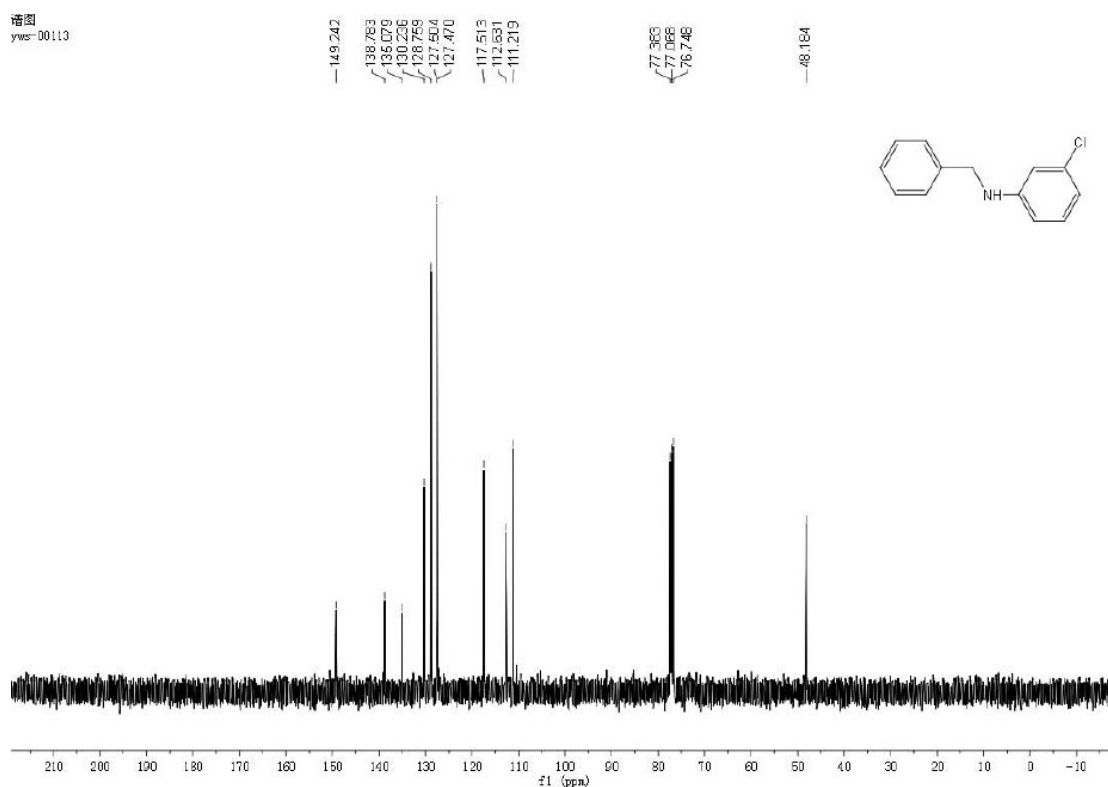

$^1\text{H}$  NMR and  $^{13}\text{C}$  NMR spectra for compound **3f**

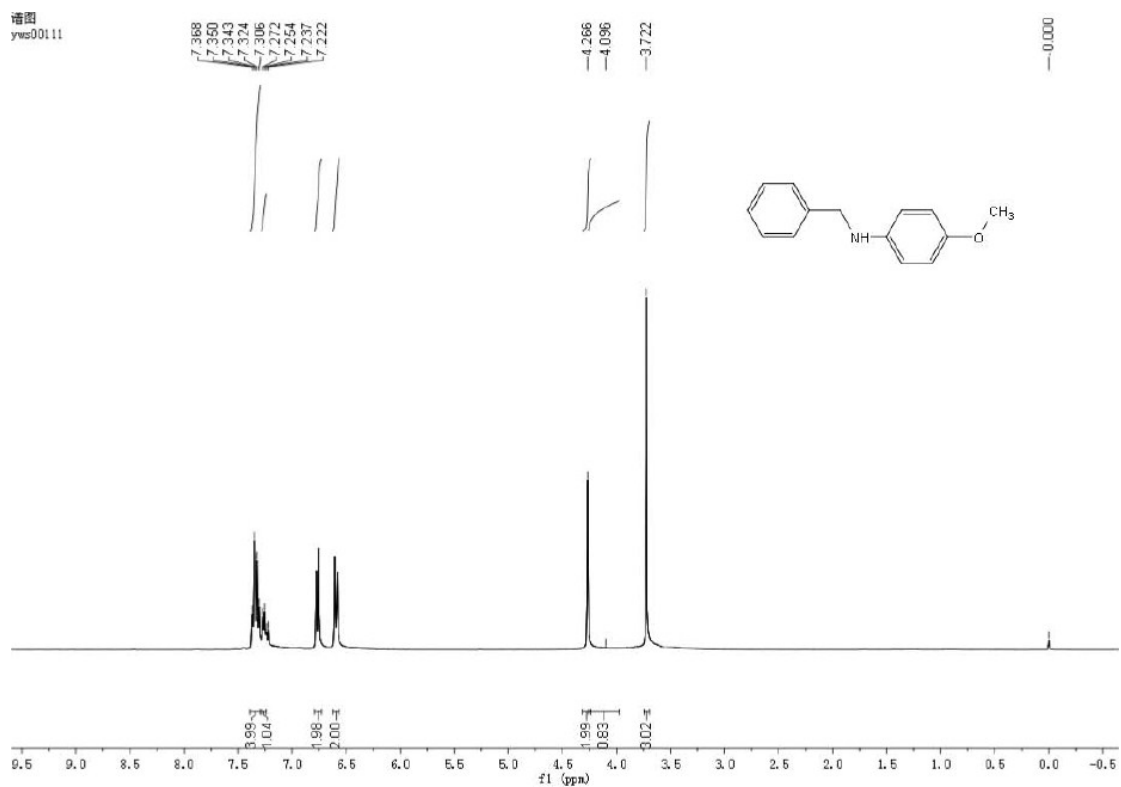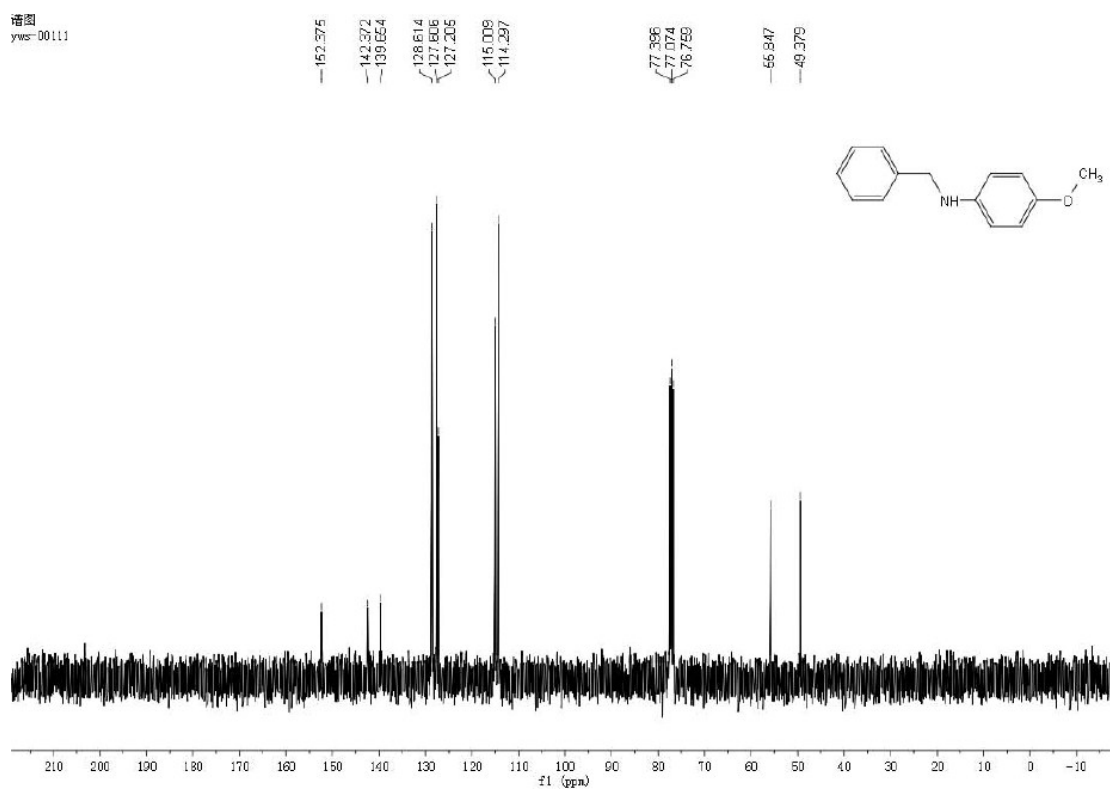

$^1\text{H}$  NMR and  $^{13}\text{C}$  NMR spectra for compound **3g**



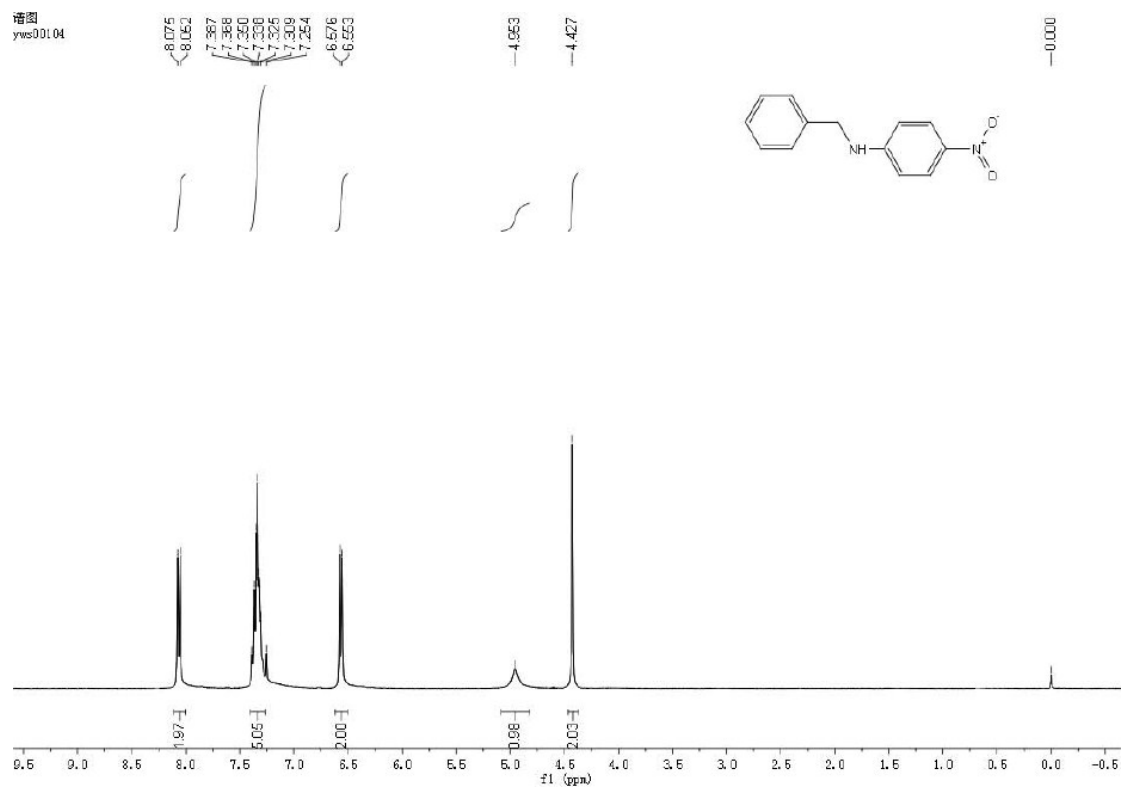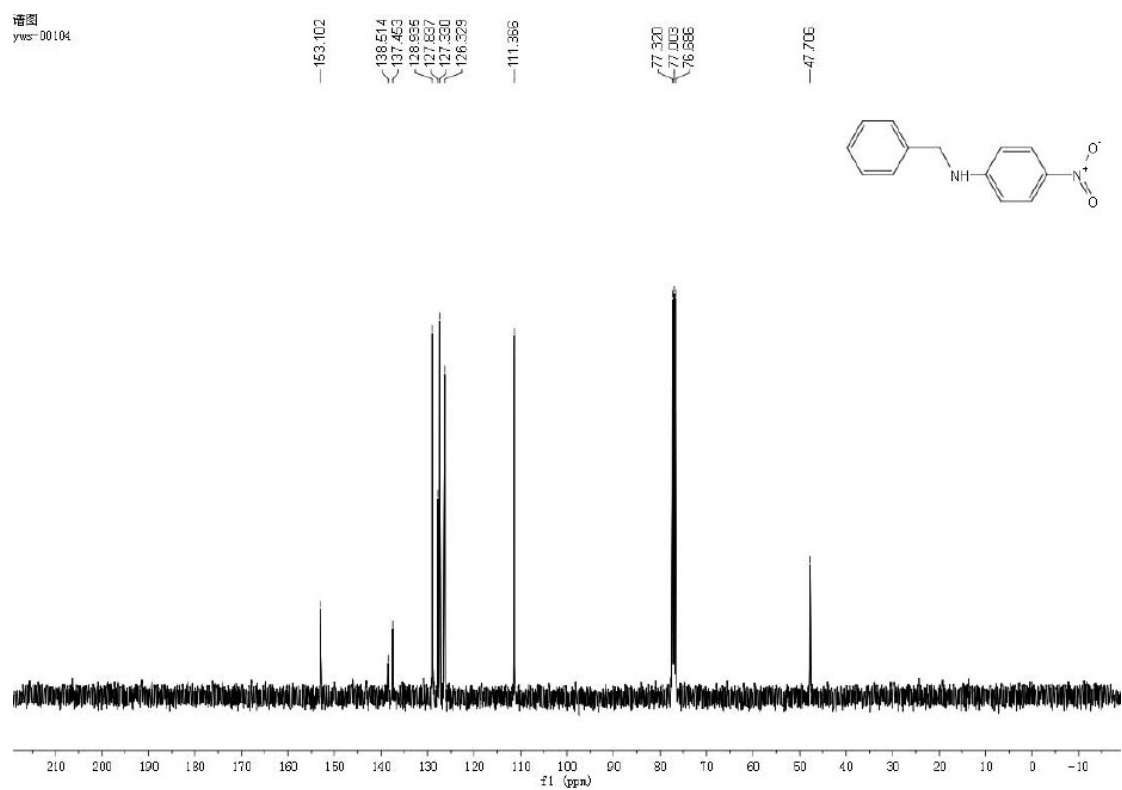

$^1\text{H}$  NMR and  $^{13}\text{C}$  NMR spectra for compound **3h**

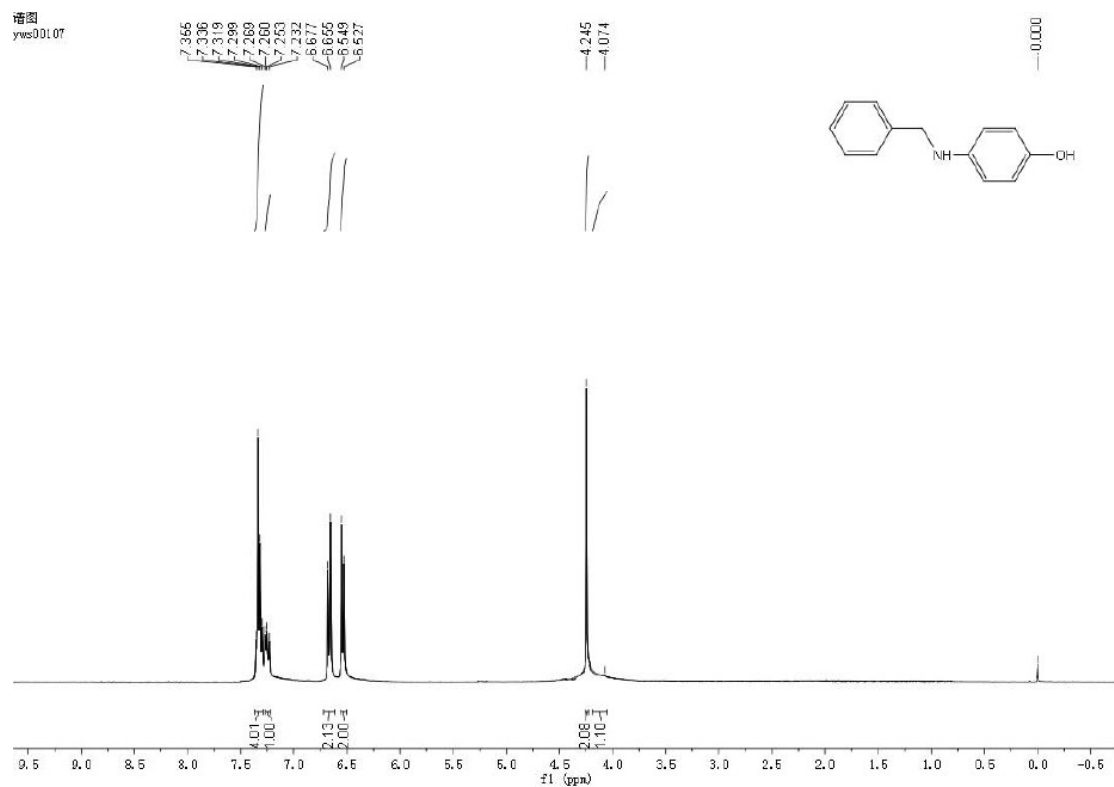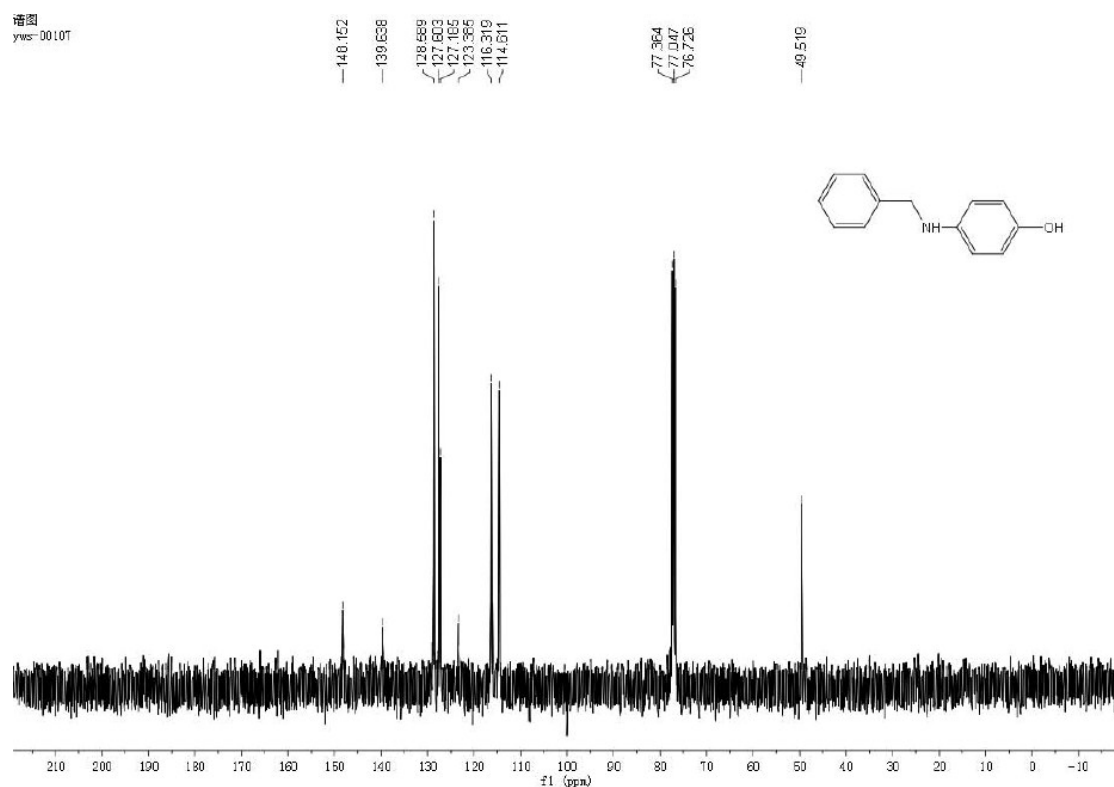

$^1\text{H}$  NMR and  $^{13}\text{C}$  NMR spectra for compound **3i**

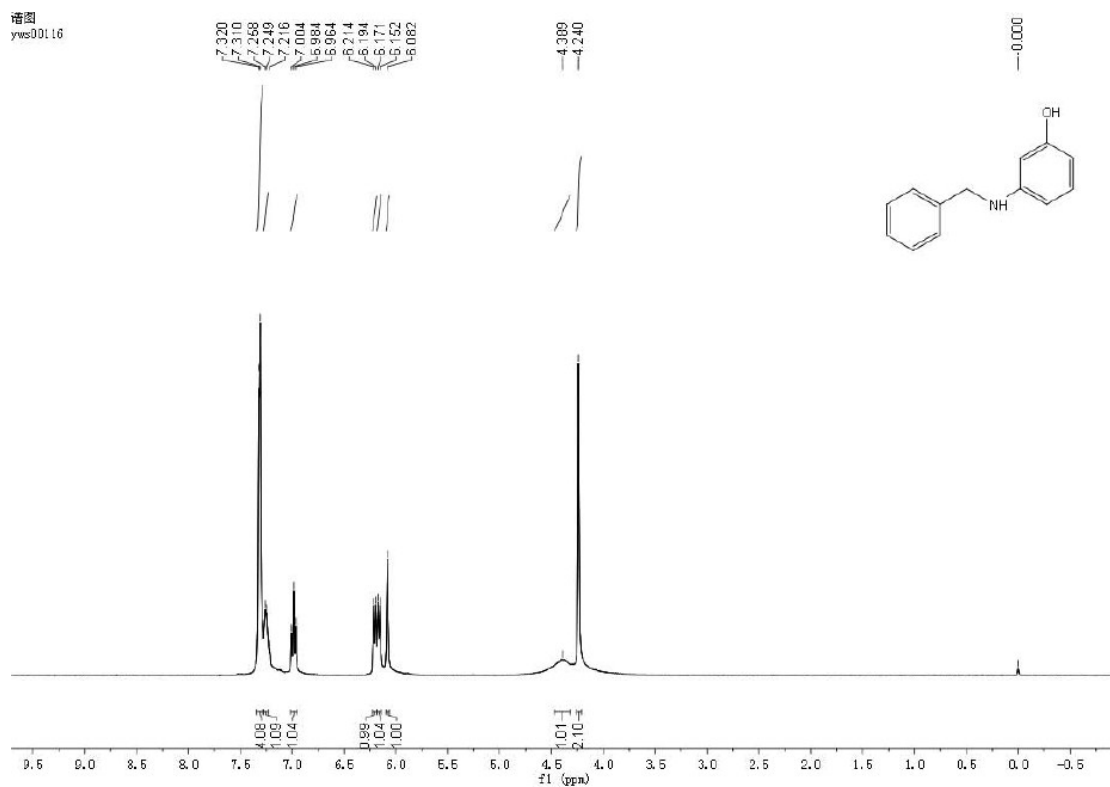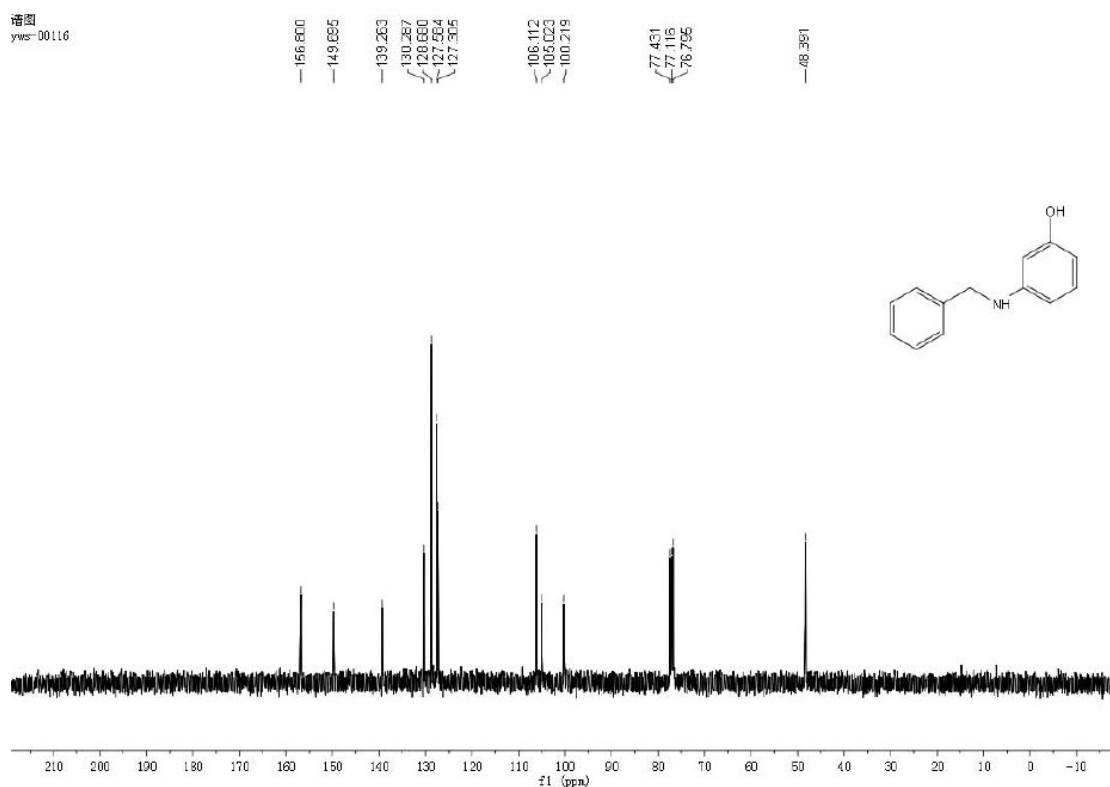

$^1\text{H}$  NMR and  $^{13}\text{C}$  NMR spectra for compound **3j**

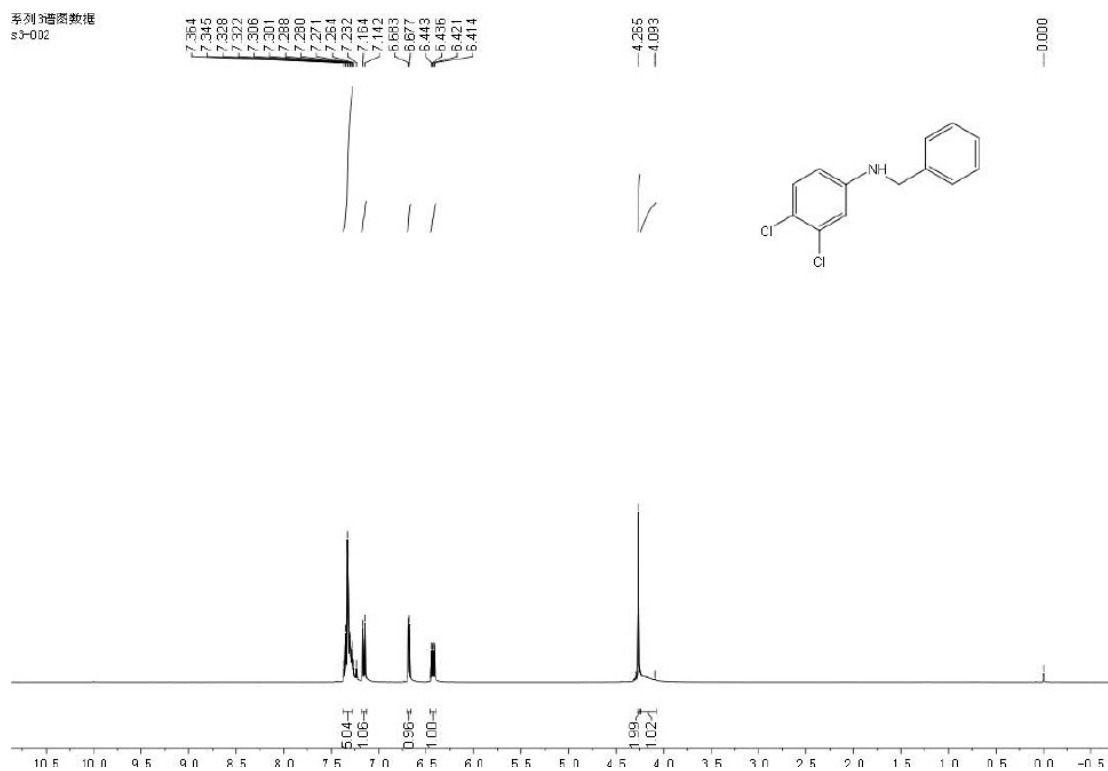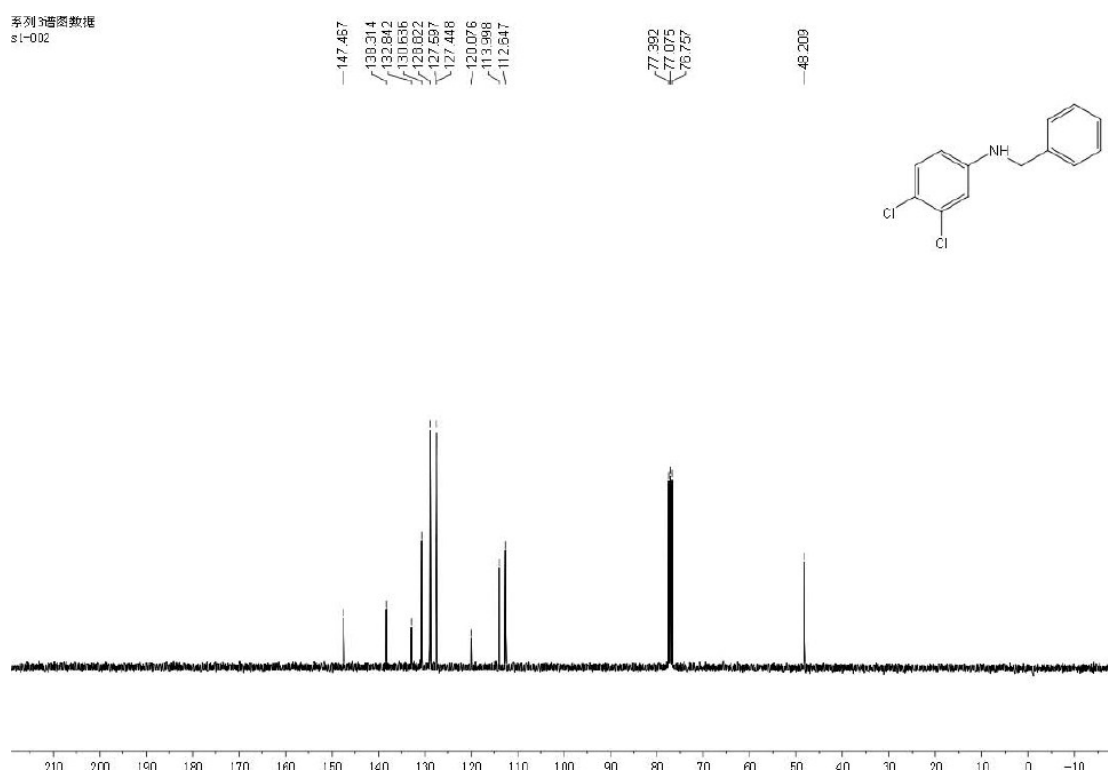

$^1\text{H}$  NMR and  $^{13}\text{C}$  NMR spectra for compound **3k**

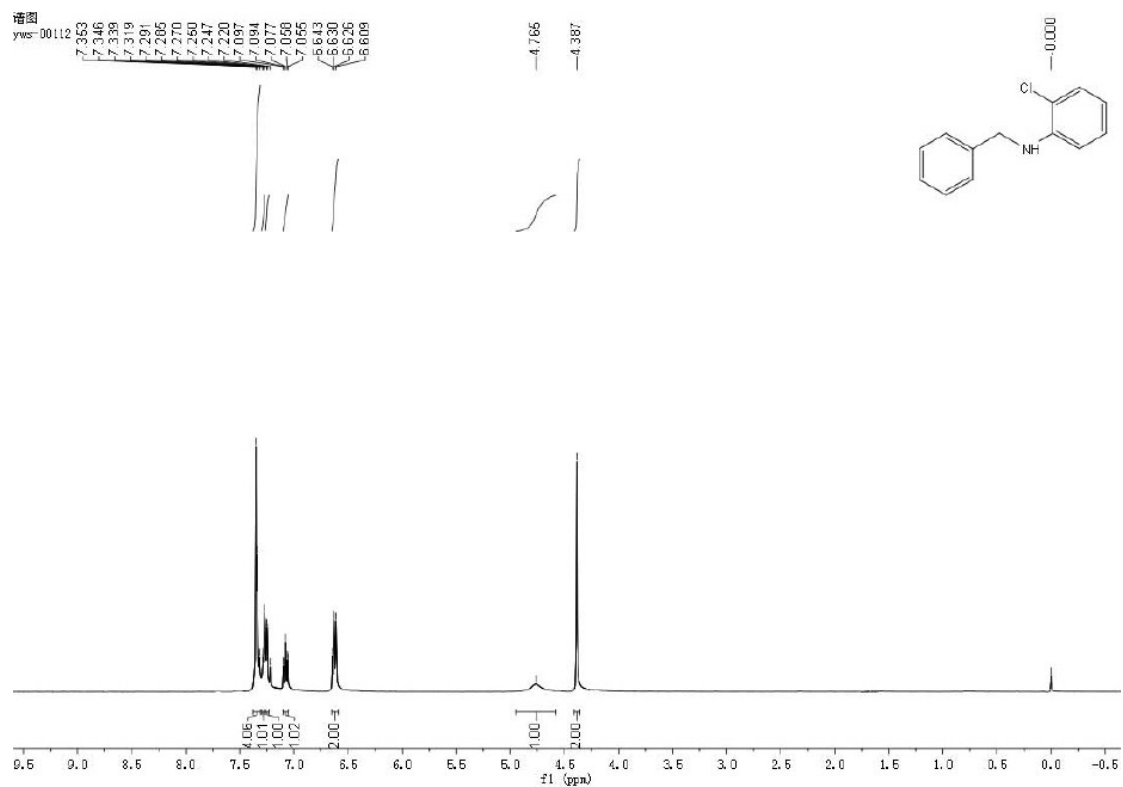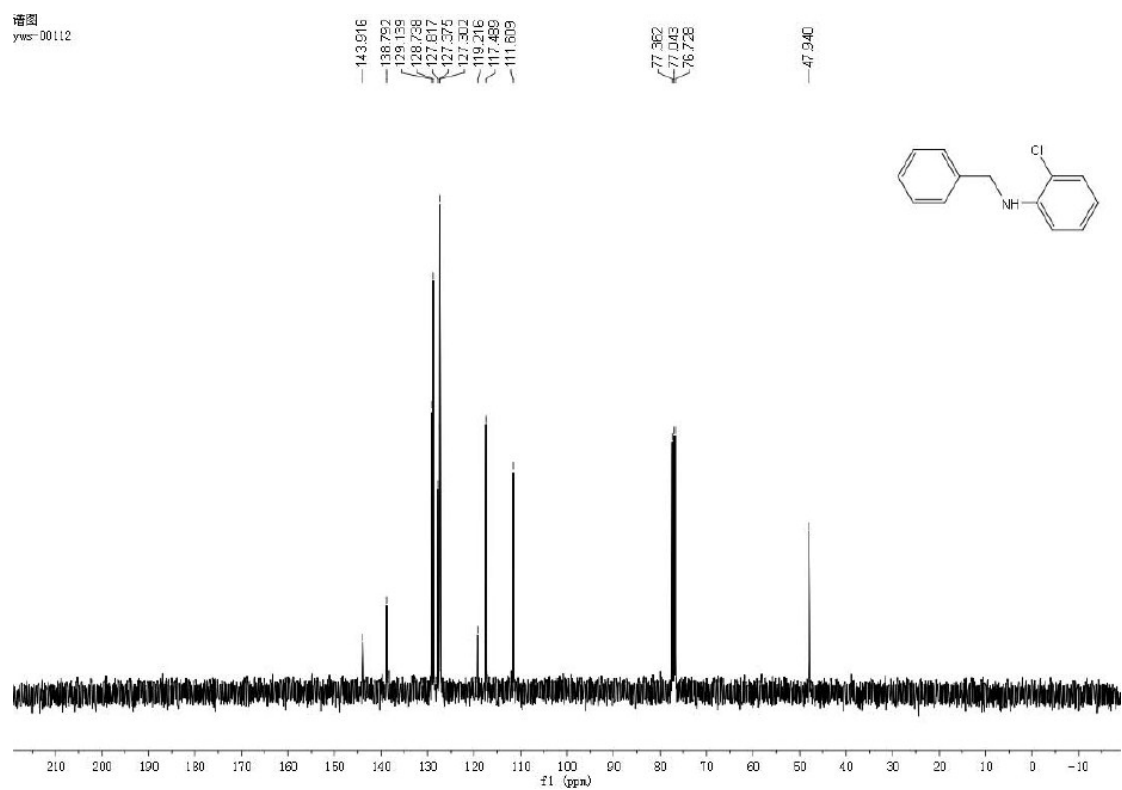

$^1\text{H}$  NMR and  $^{13}\text{C}$  NMR spectra for compound **31**

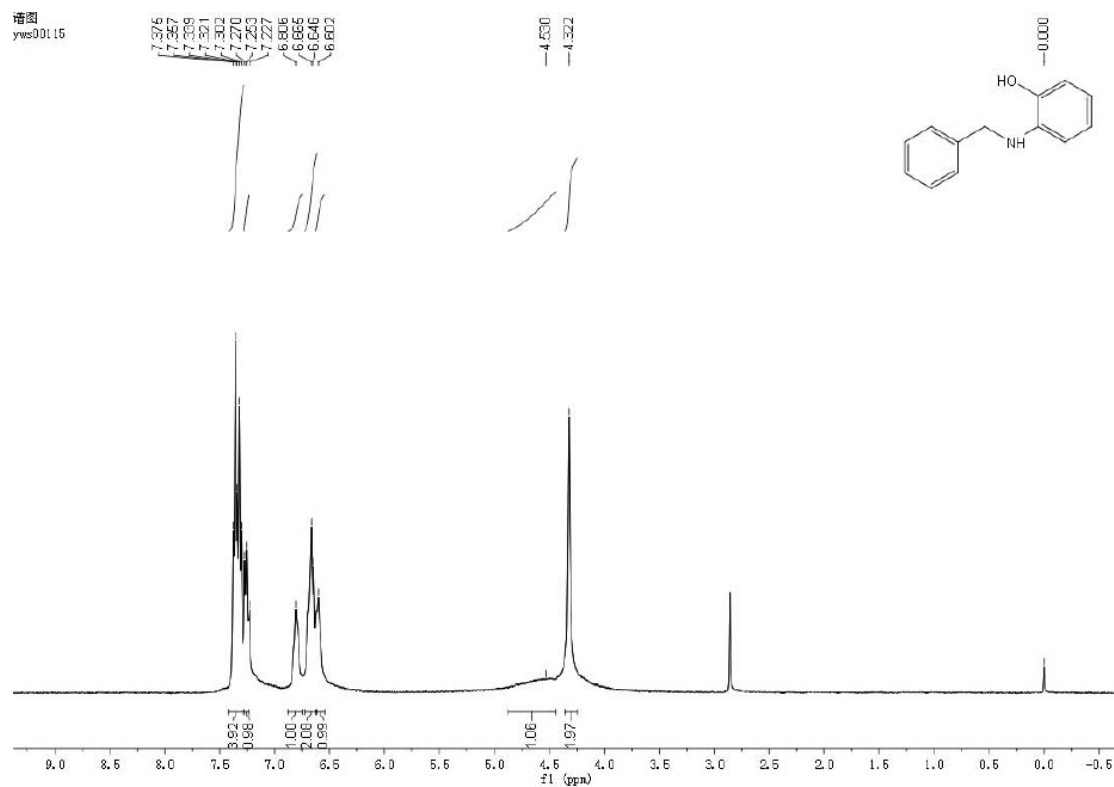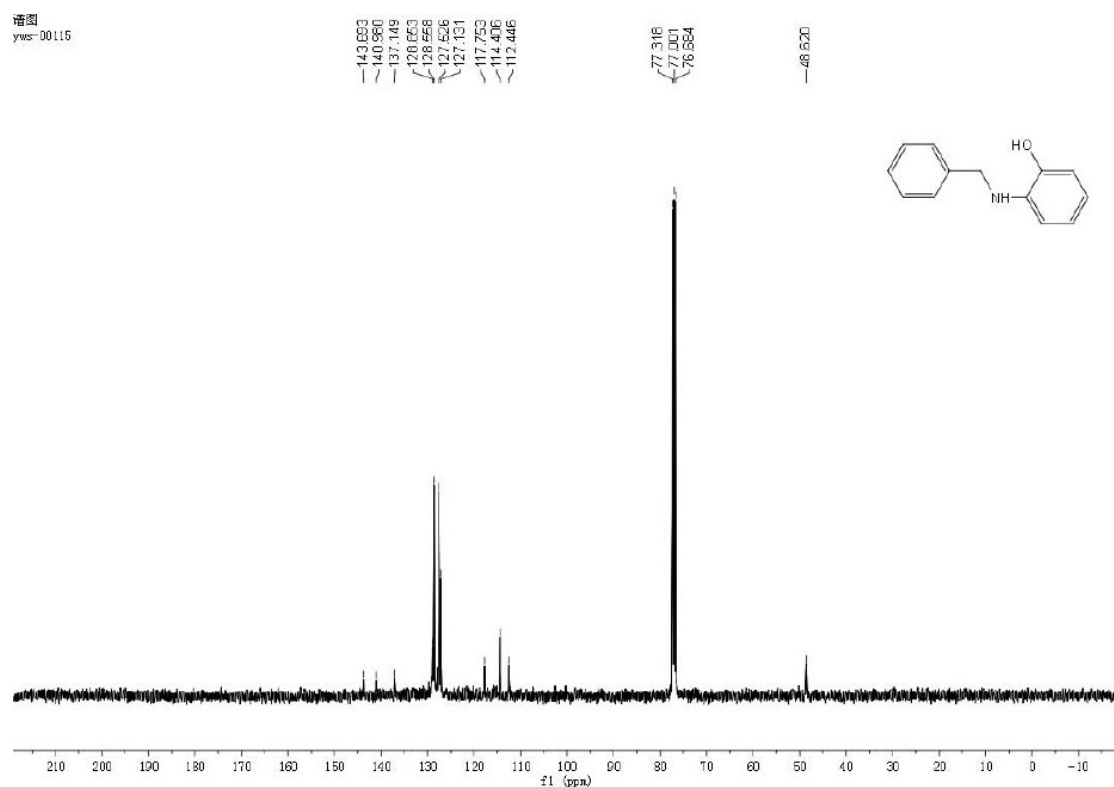

$^1\text{H}$  NMR and  $^{13}\text{C}$  NMR spectra for compound **3m**

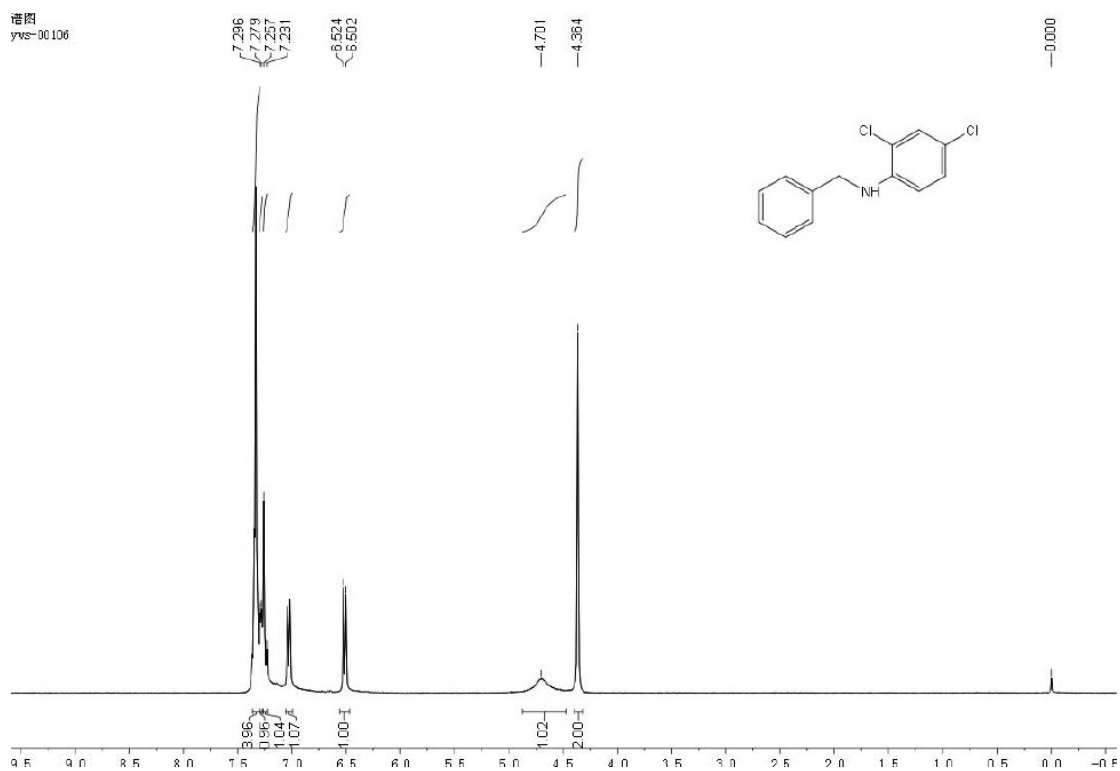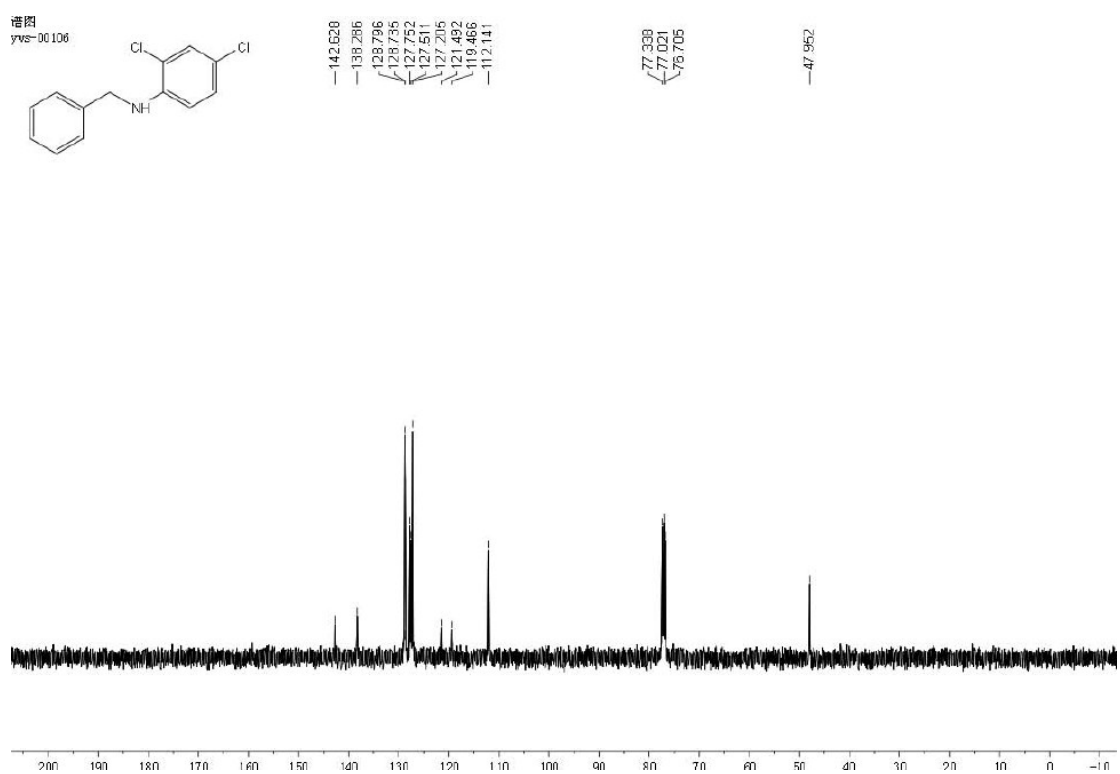

$^1\text{H}$  NMR and  $^{13}\text{C}$  NMR spectra for compound **3n**

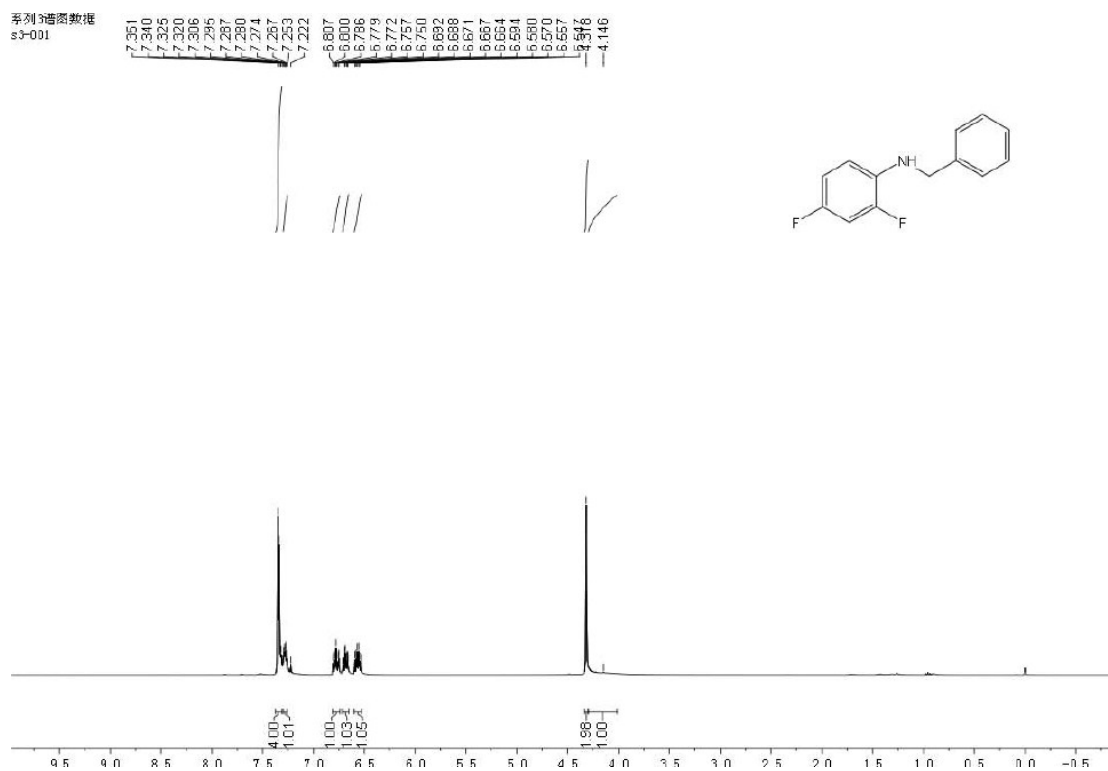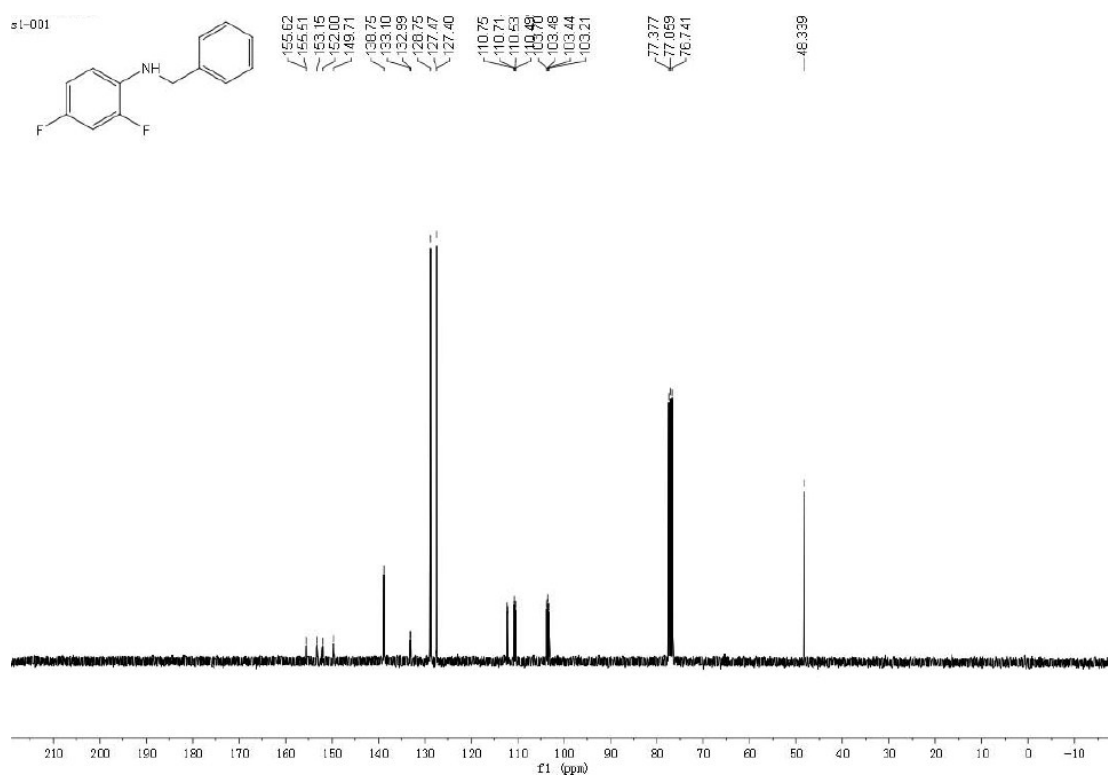

<sup>1</sup>H NMR and <sup>13</sup>C NMR spectra for compound **30**



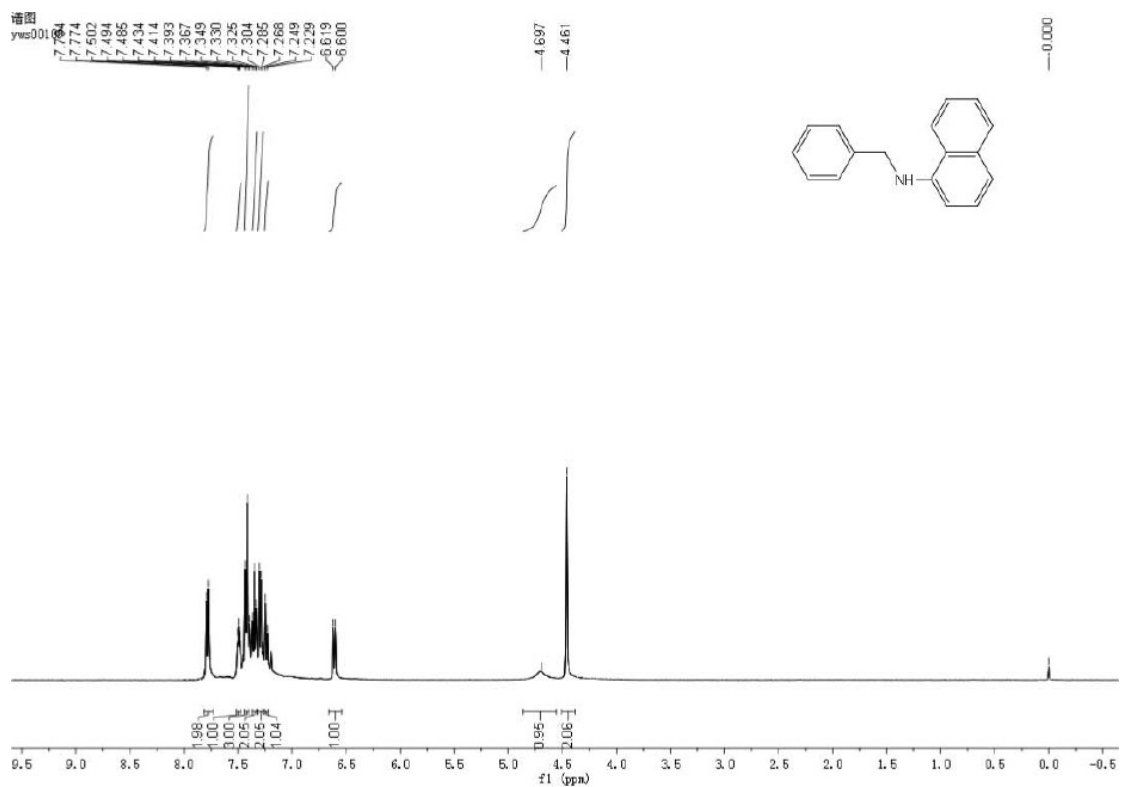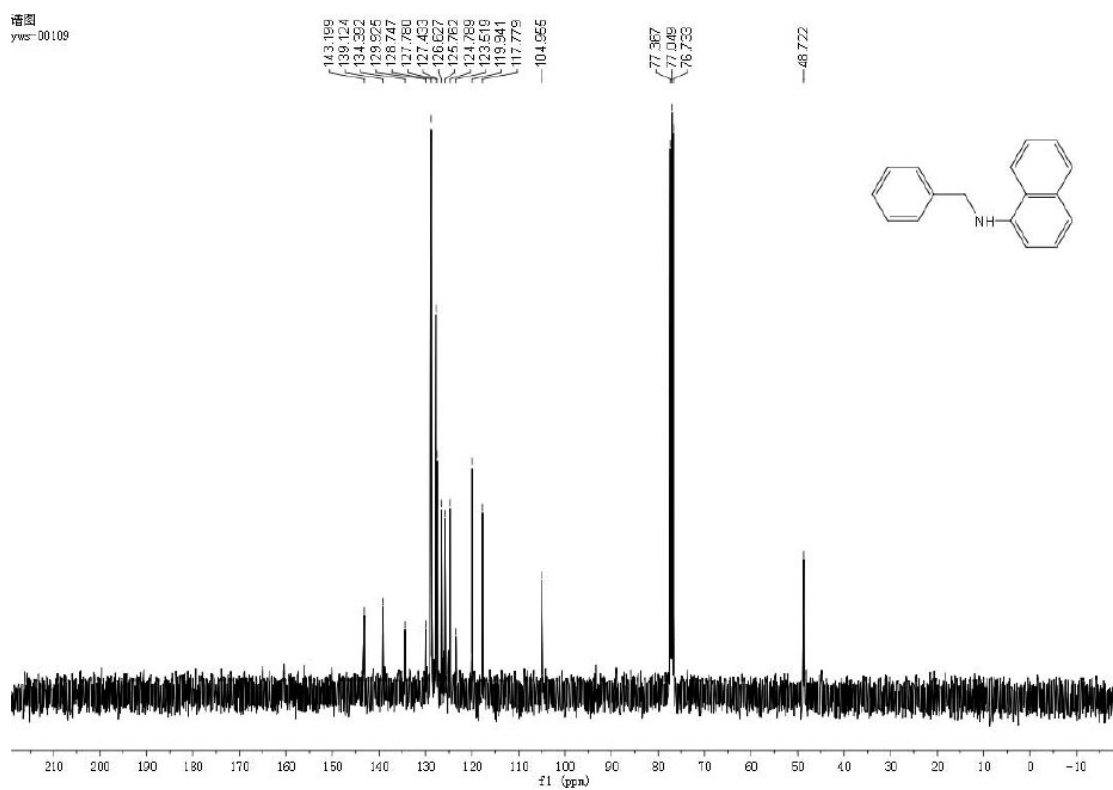

$^1\text{H}$  NMR and  $^{13}\text{C}$  NMR spectra for compound **3p**

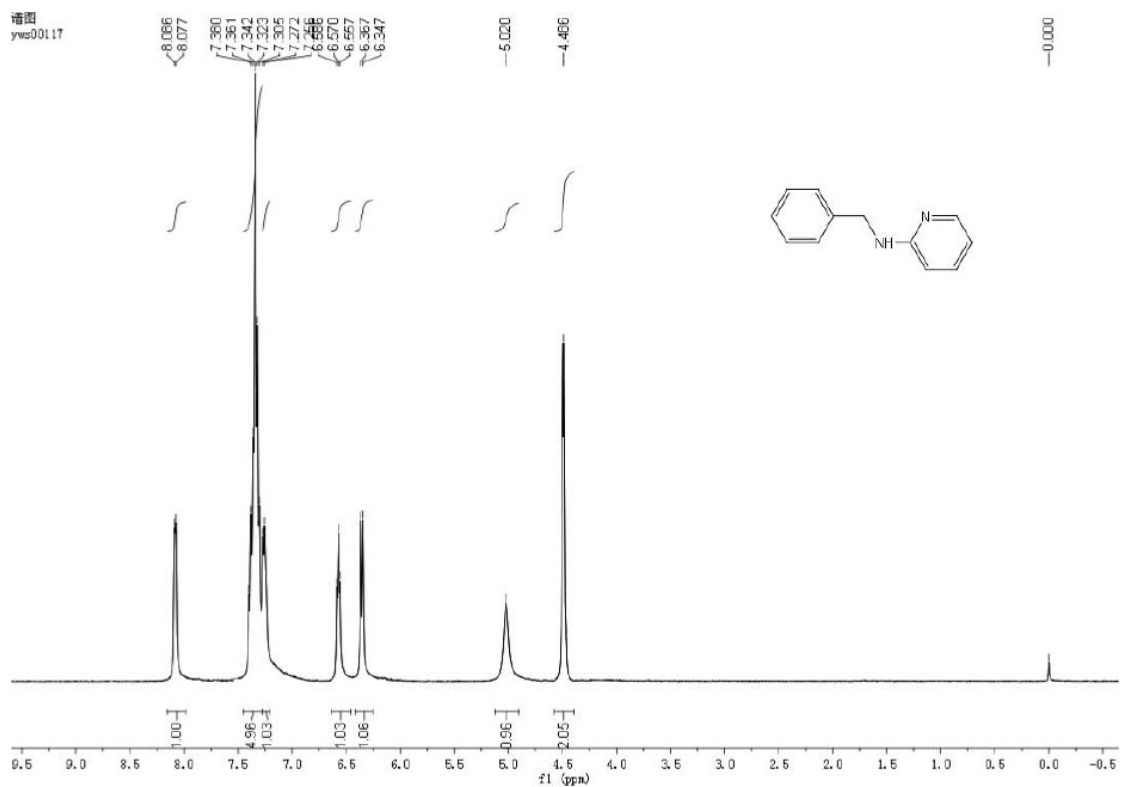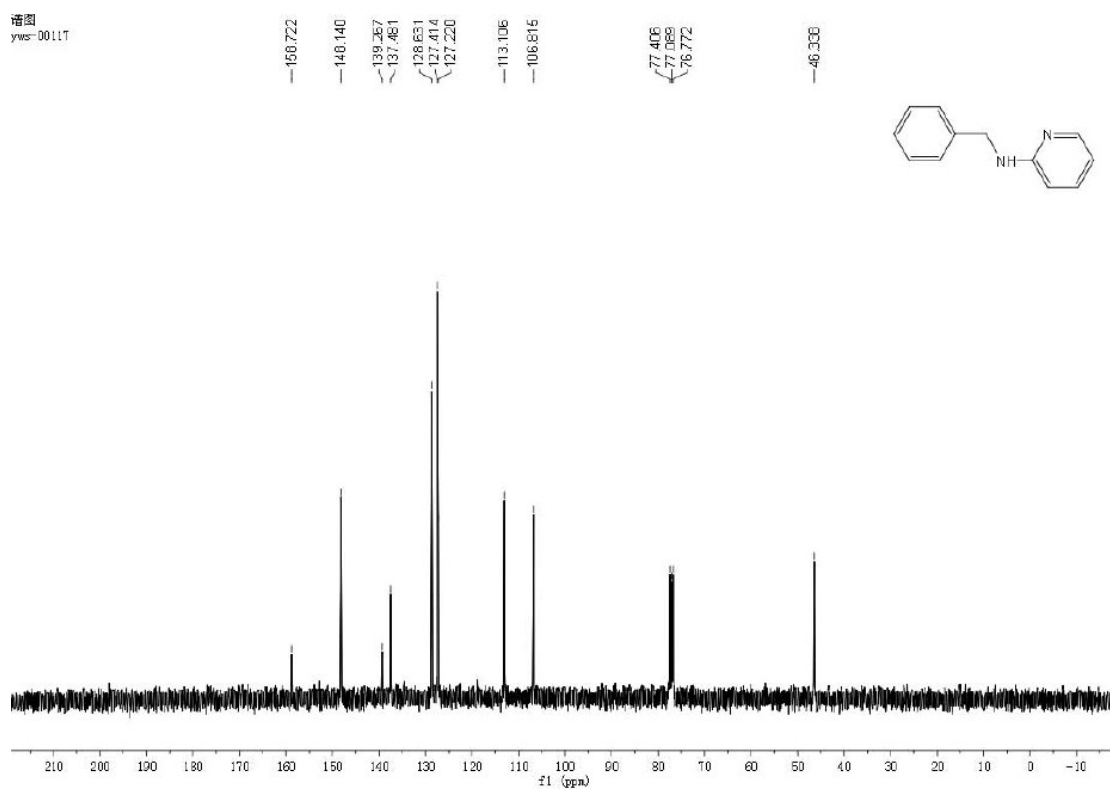

<sup>1</sup>H NMR and <sup>13</sup>C NMR spectra for compound **3q**

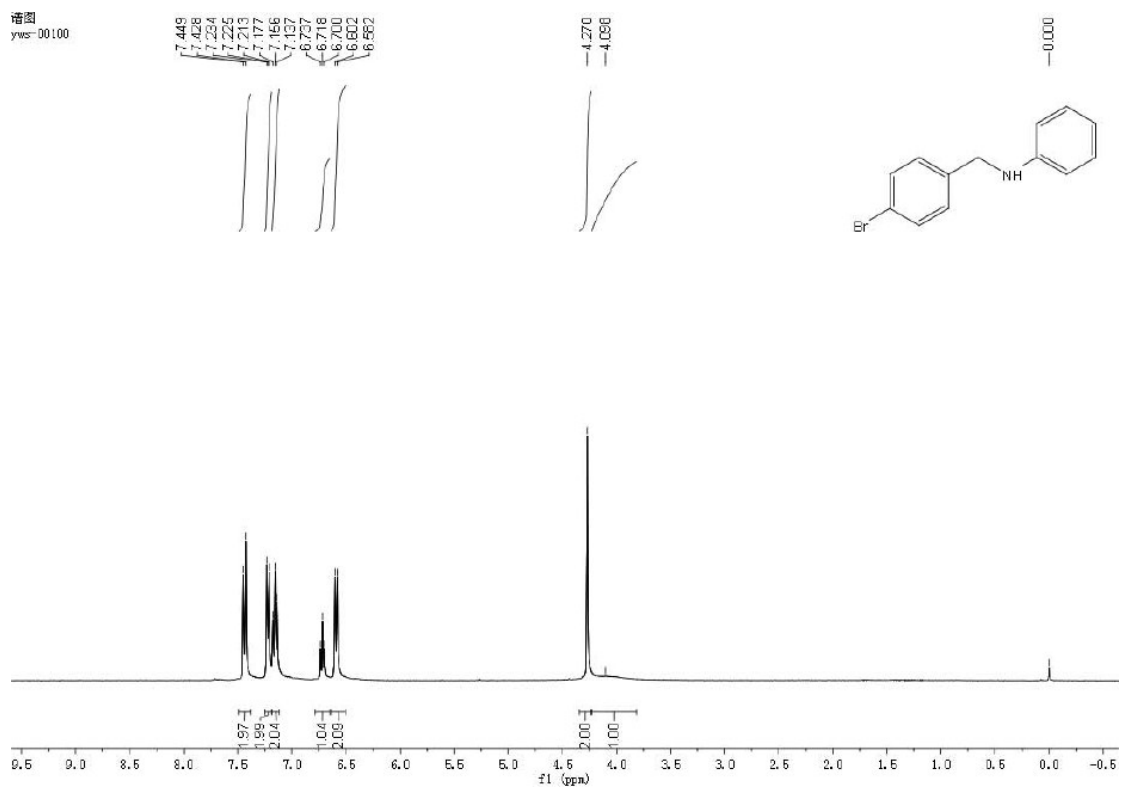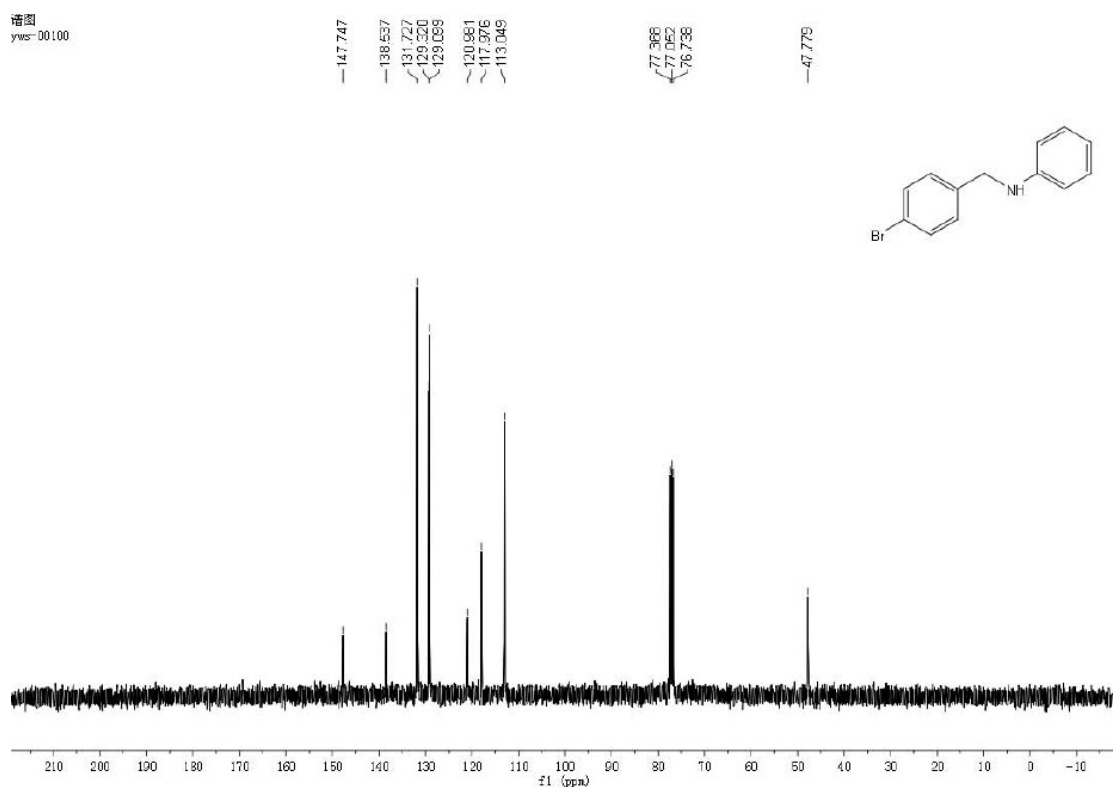

$^1\text{H}$  NMR and  $^{13}\text{C}$  NMR spectra for compound **3r**

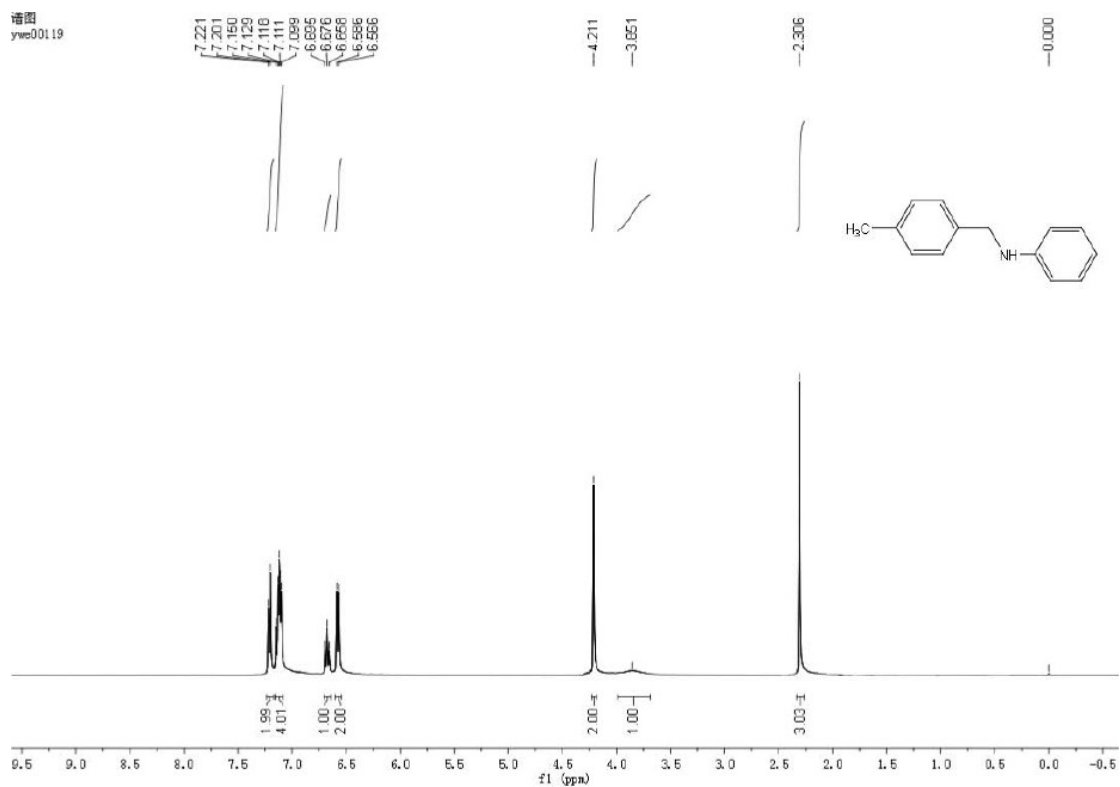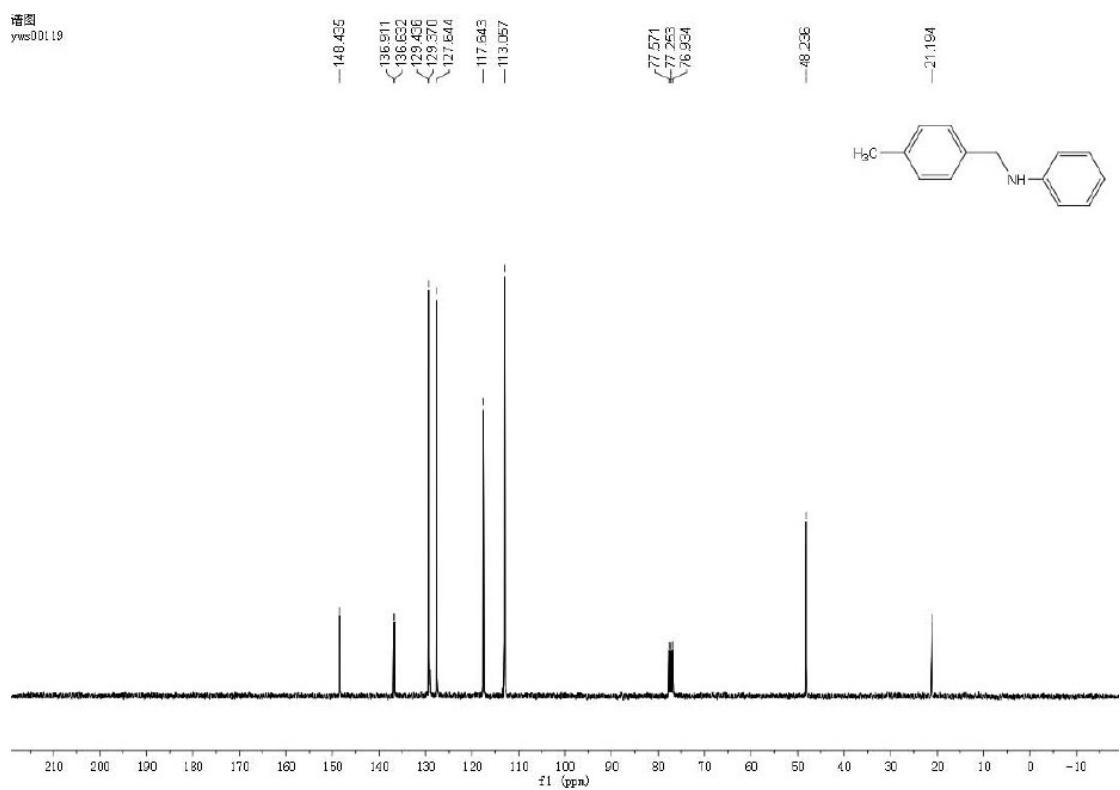

$^1\text{H}$  NMR and  $^{13}\text{C}$  NMR spectra for compound **3s**

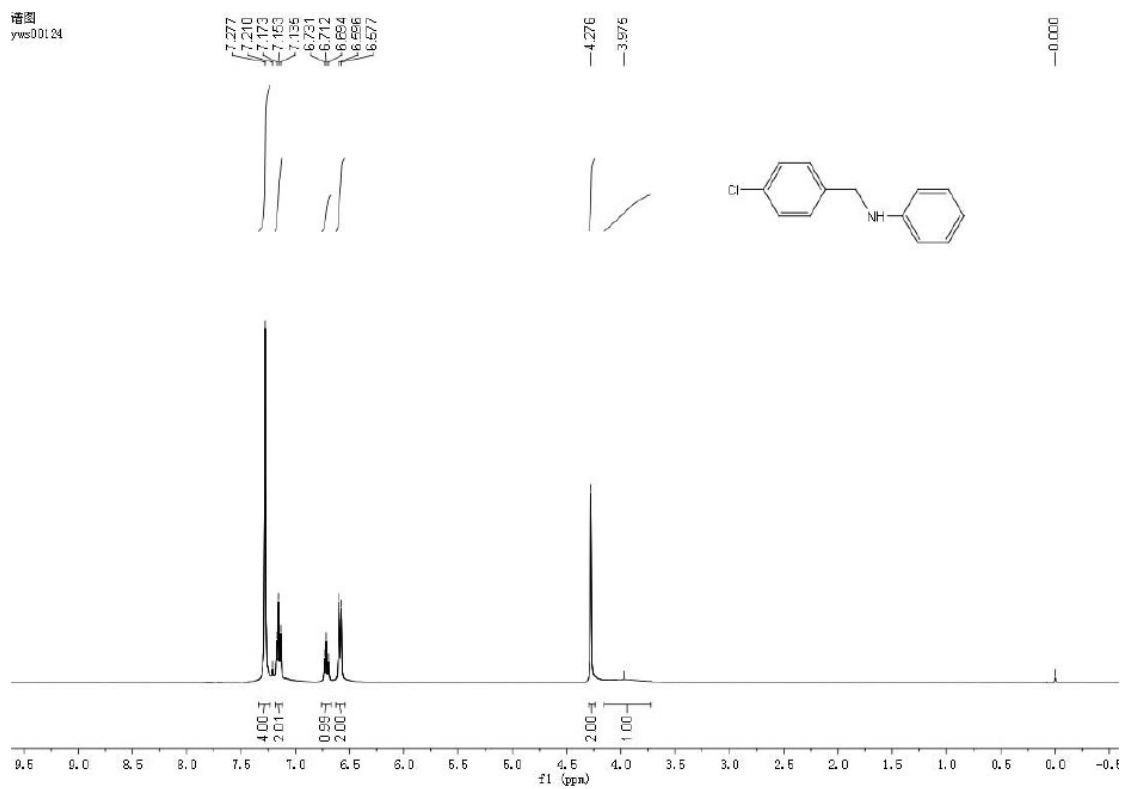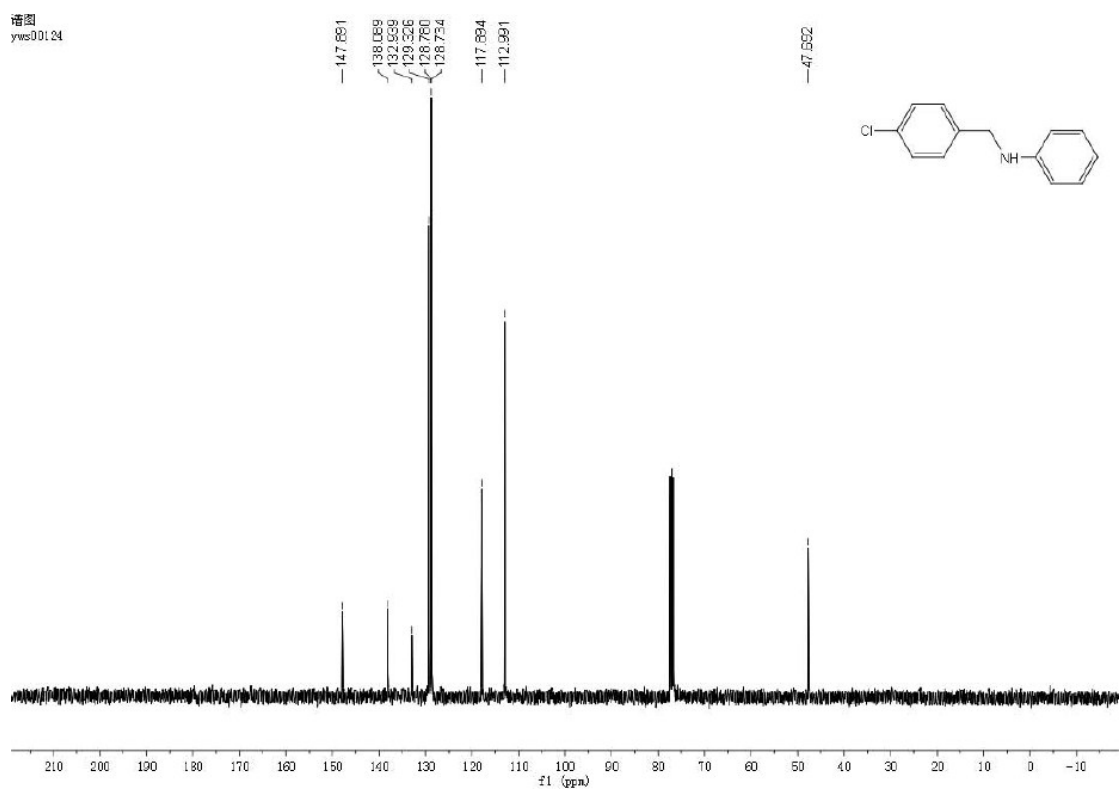

$^1\text{H}$  NMR and  $^{13}\text{C}$  NMR spectra for compound **3t**

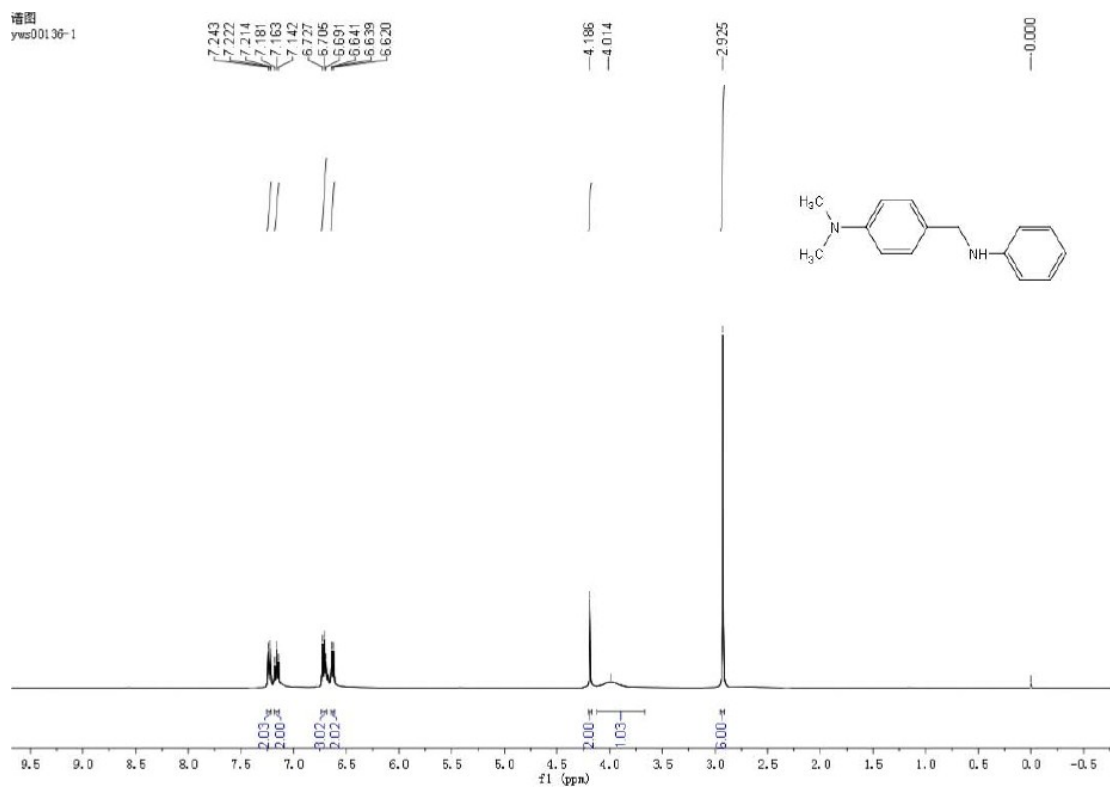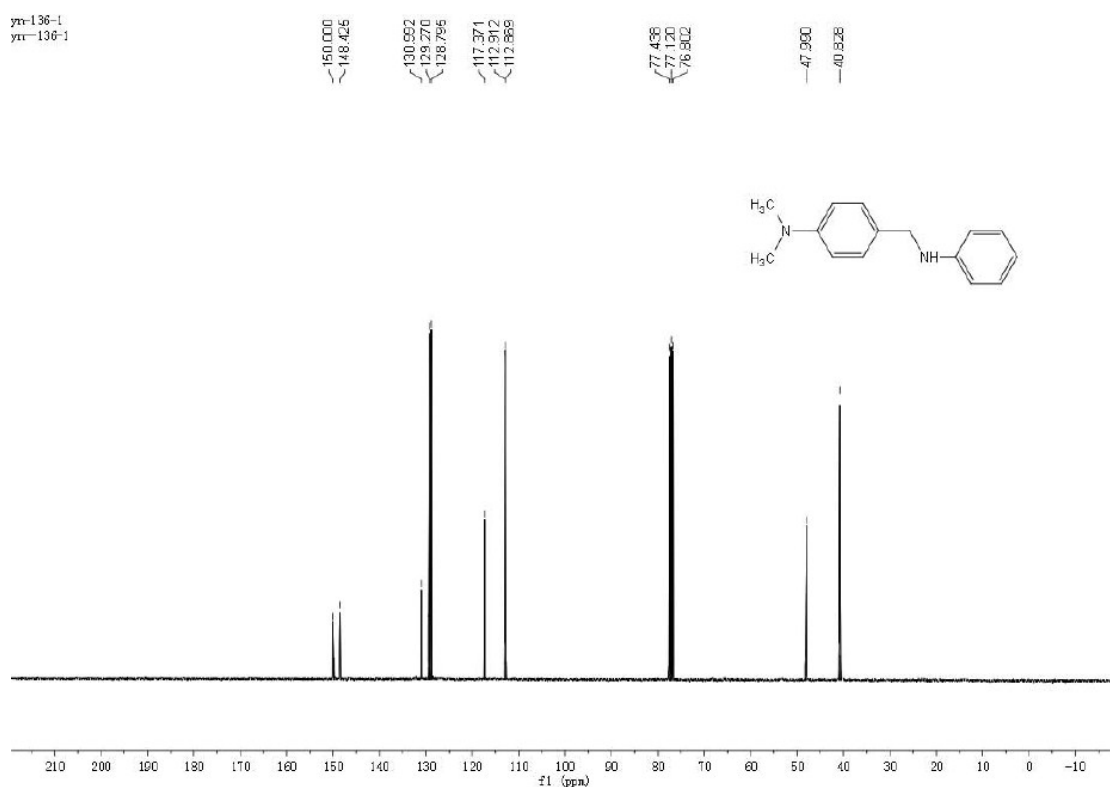

$^1\text{H}$  NMR and  $^{13}\text{C}$  NMR spectra for compound **3u**

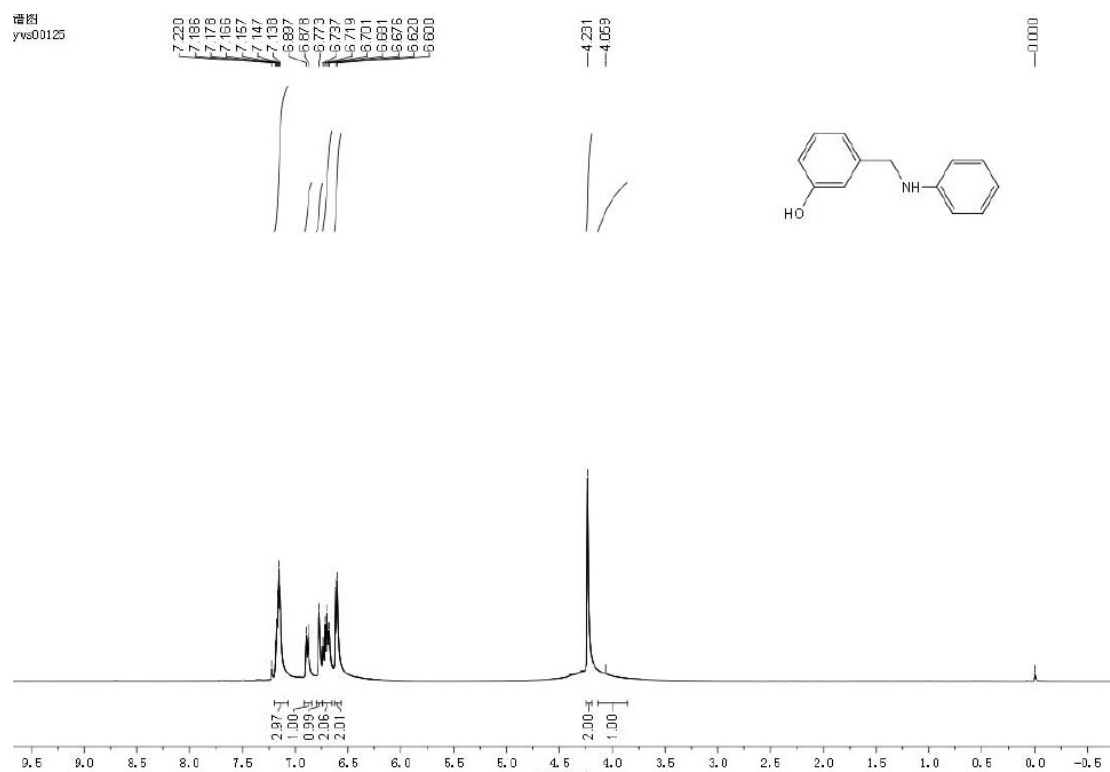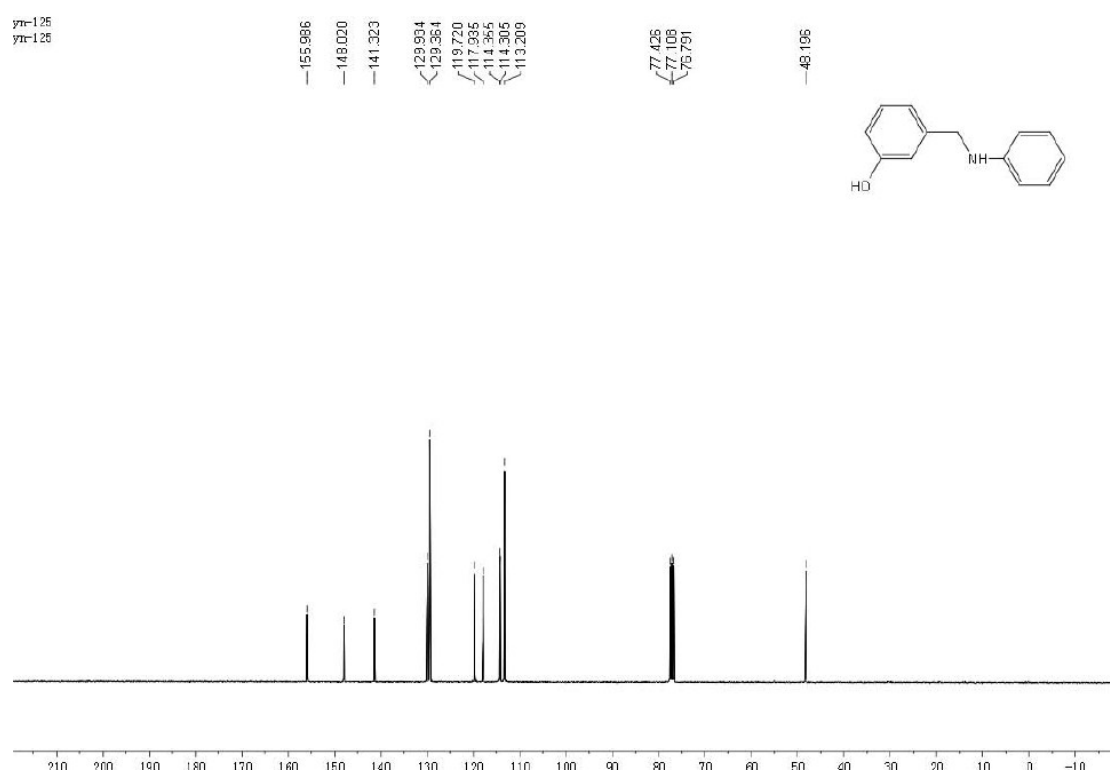

<sup>1</sup>H NMR and <sup>13</sup>C NMR spectra for compound **3v**

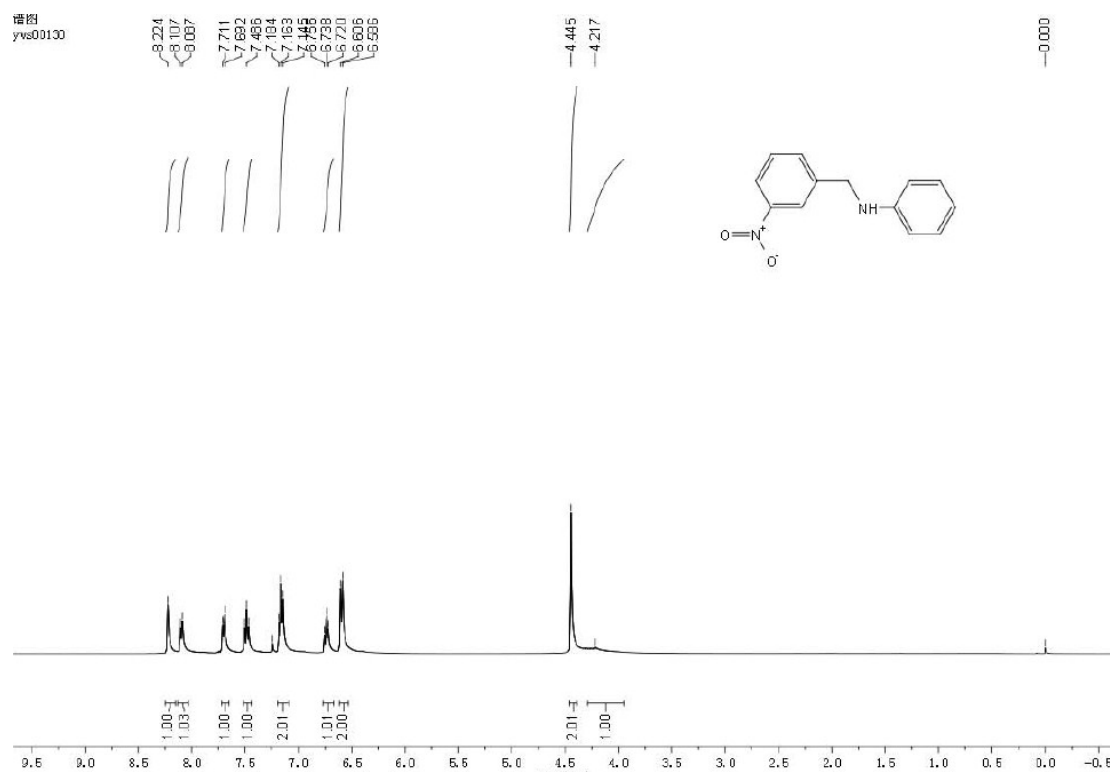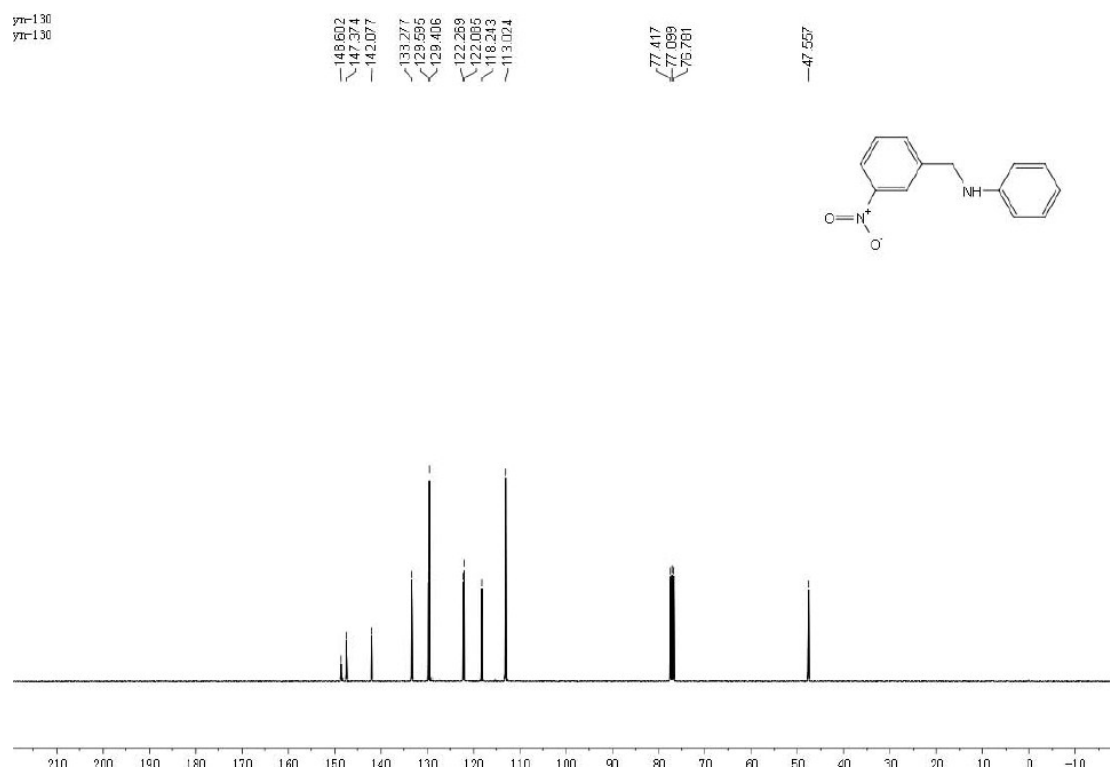

<sup>1</sup>H NMR and <sup>13</sup>C NMR spectra for compound **3w**



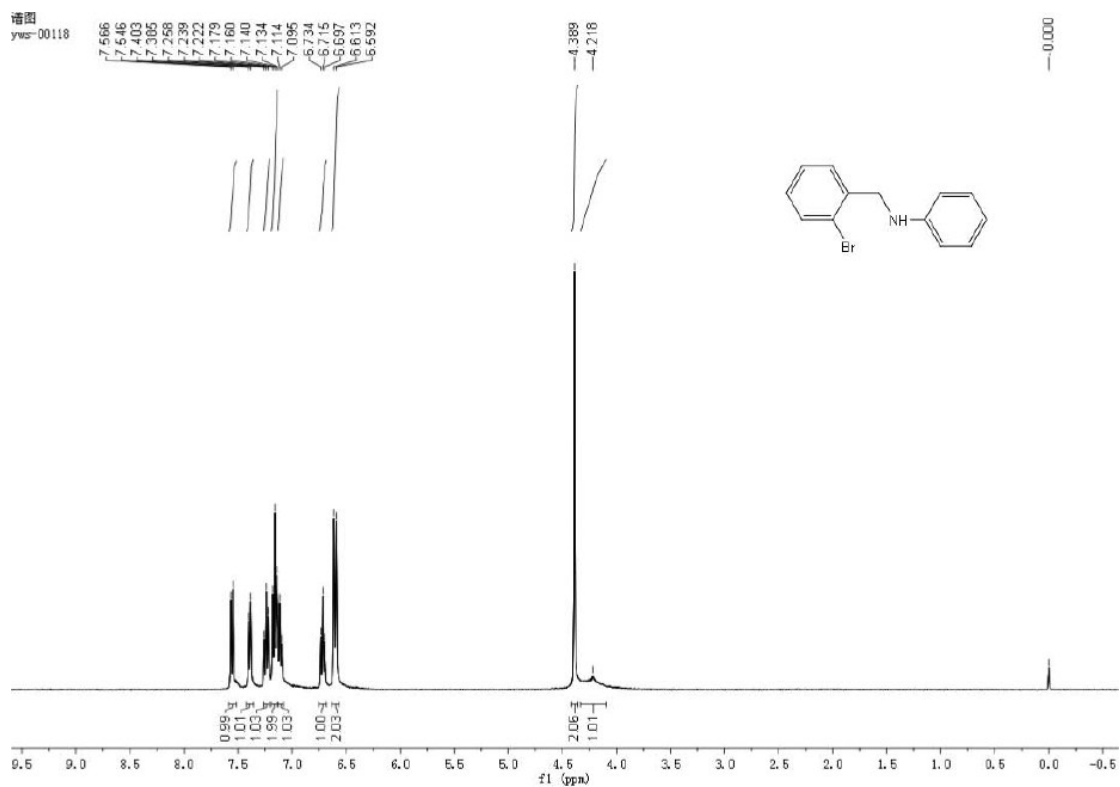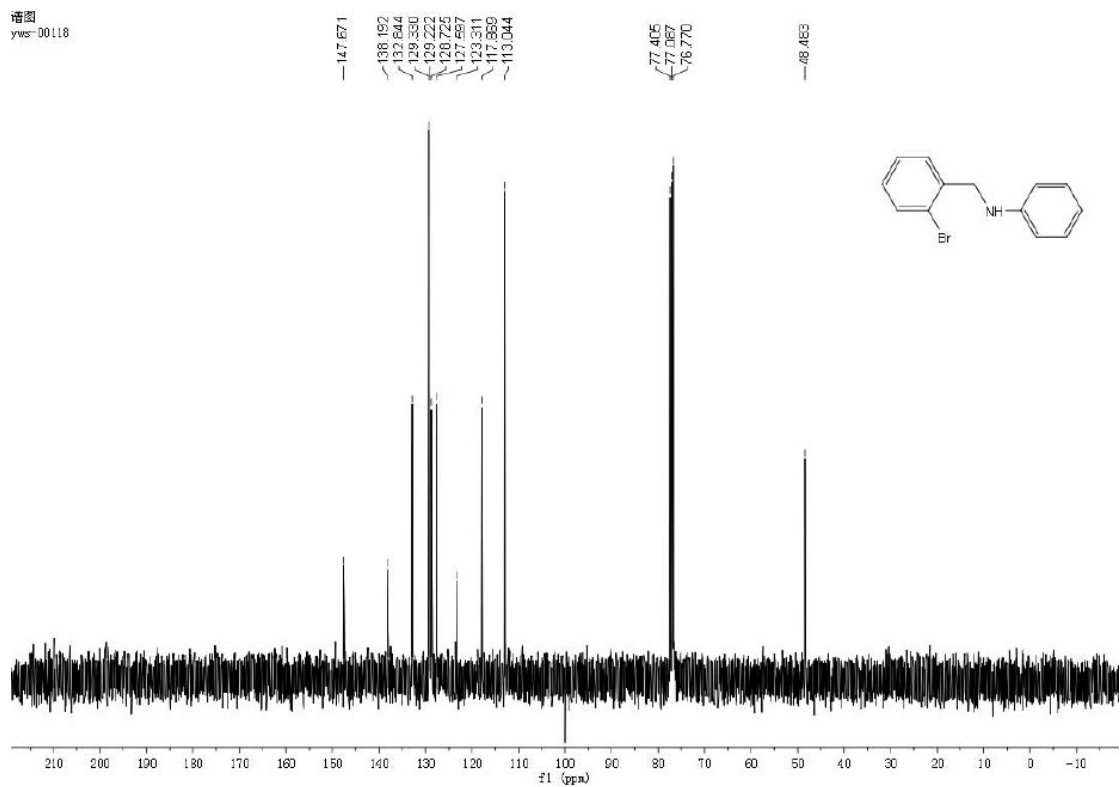

$^1\text{H}$  NMR and  $^{13}\text{C}$  NMR spectra for compound **3x**

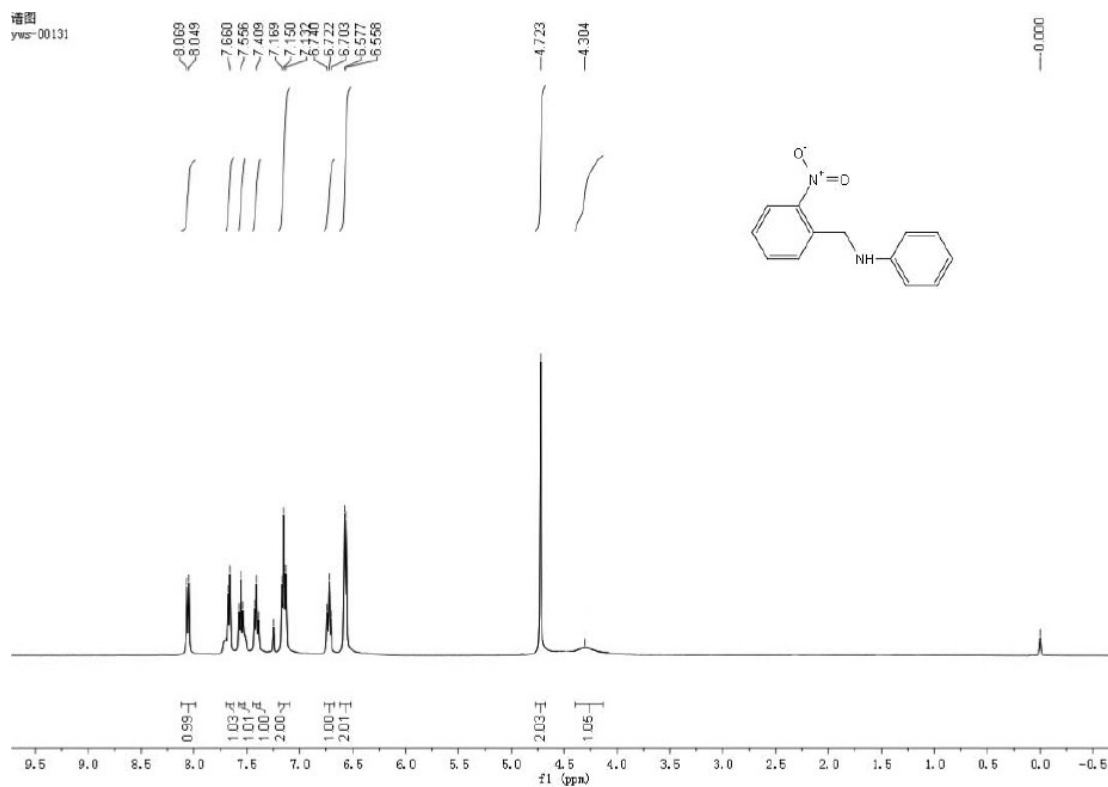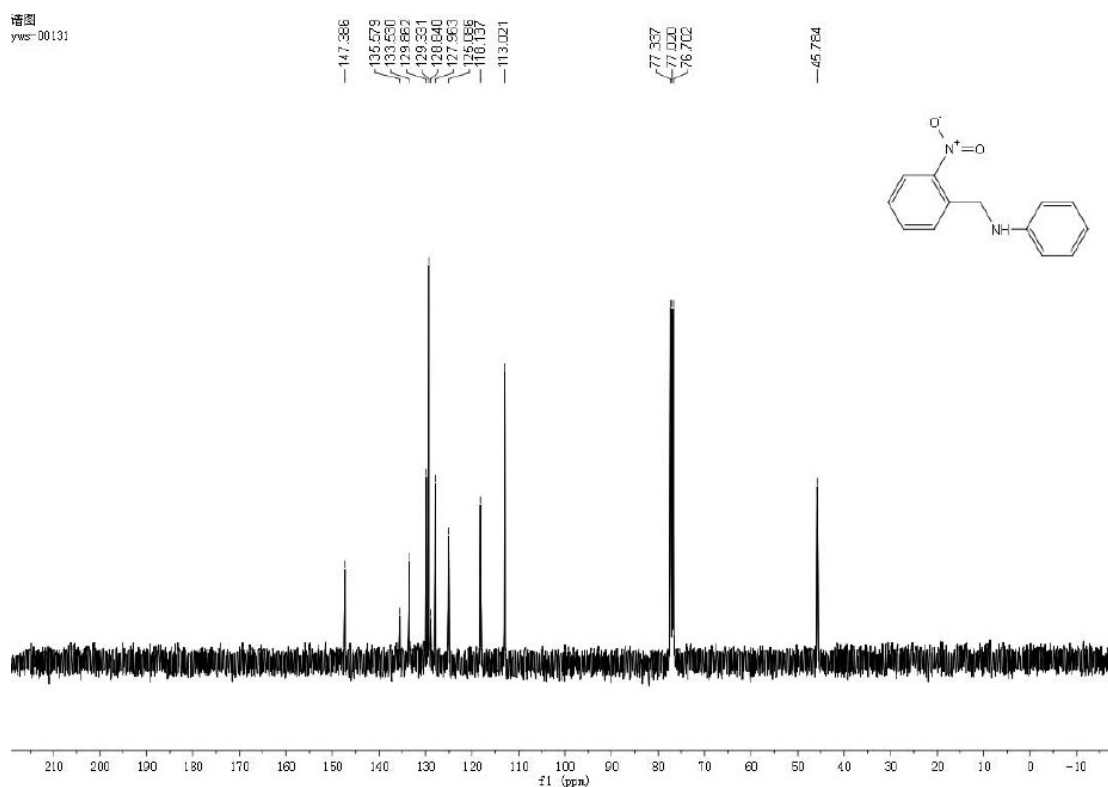

$^1\text{H}$  NMR and  $^{13}\text{C}$  NMR spectra for compound 3y

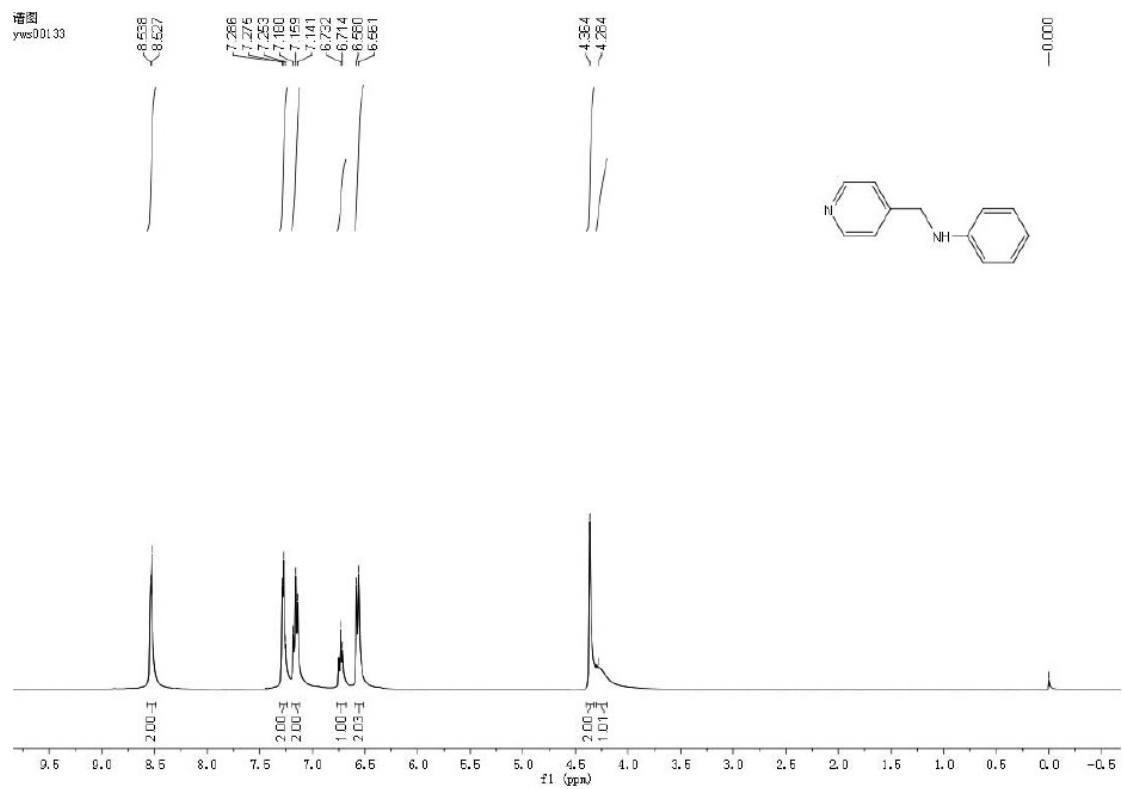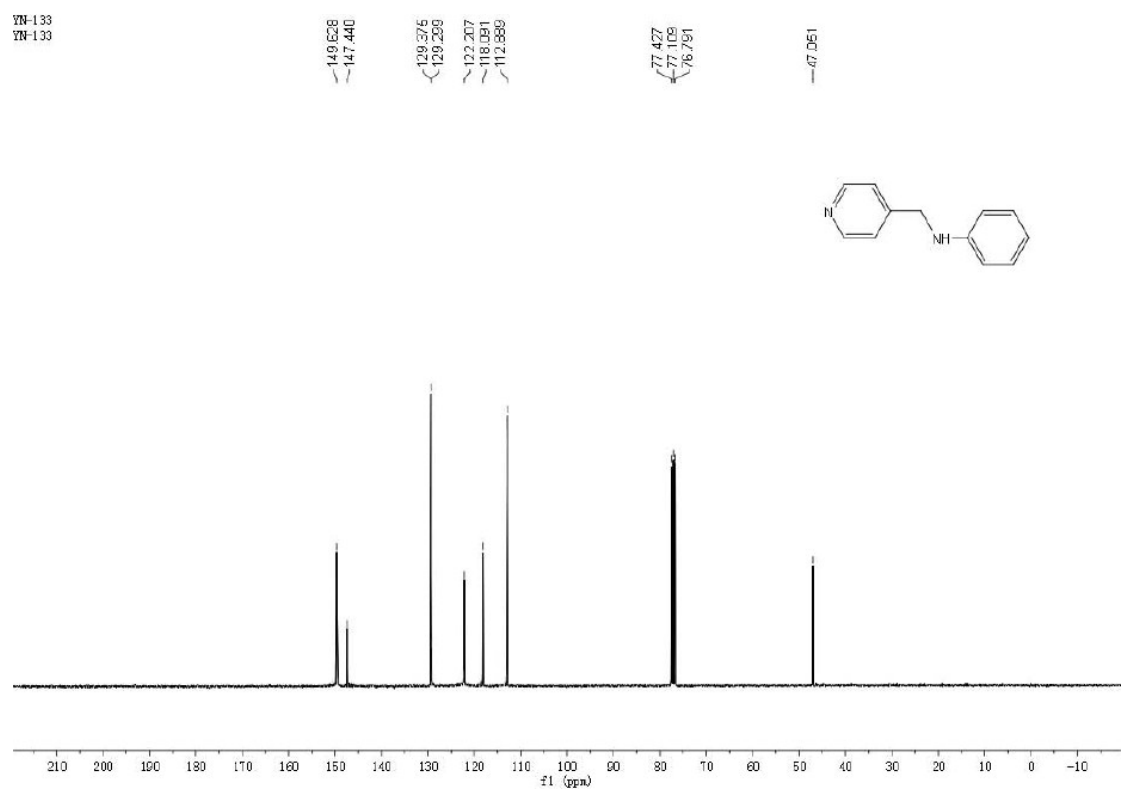

$^1\text{H}$  NMR and  $^{13}\text{C}$  NMR spectra for compound **3z**

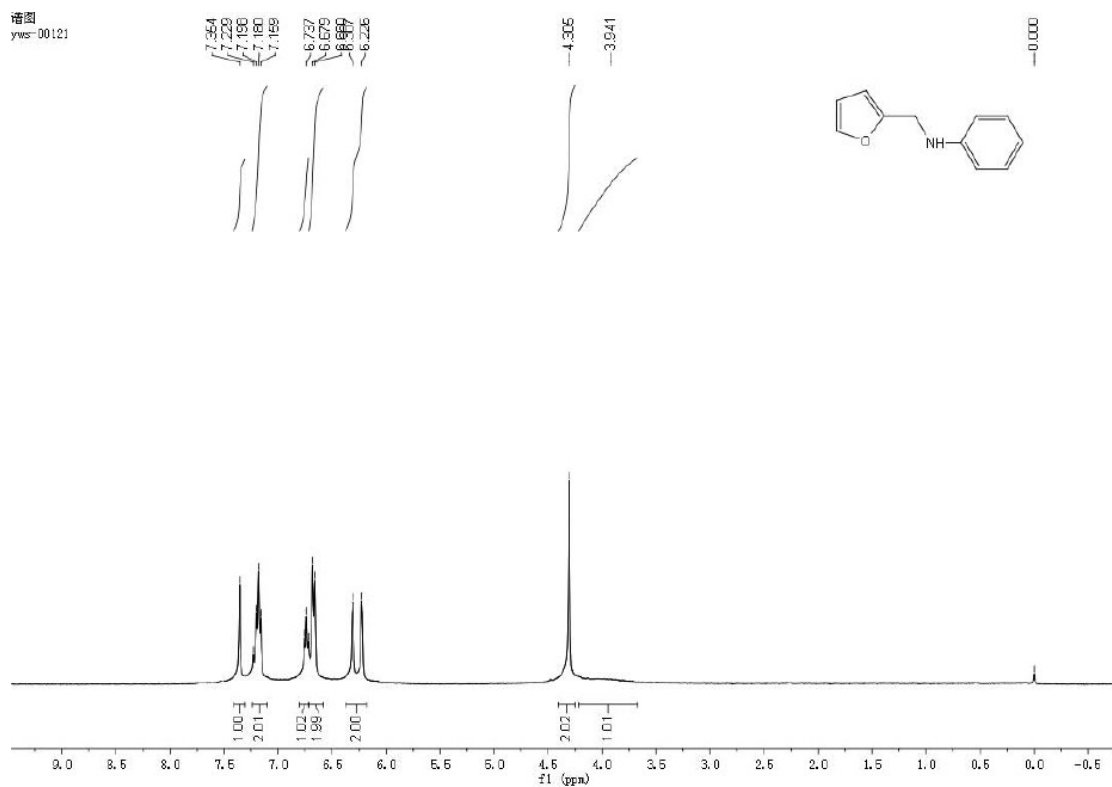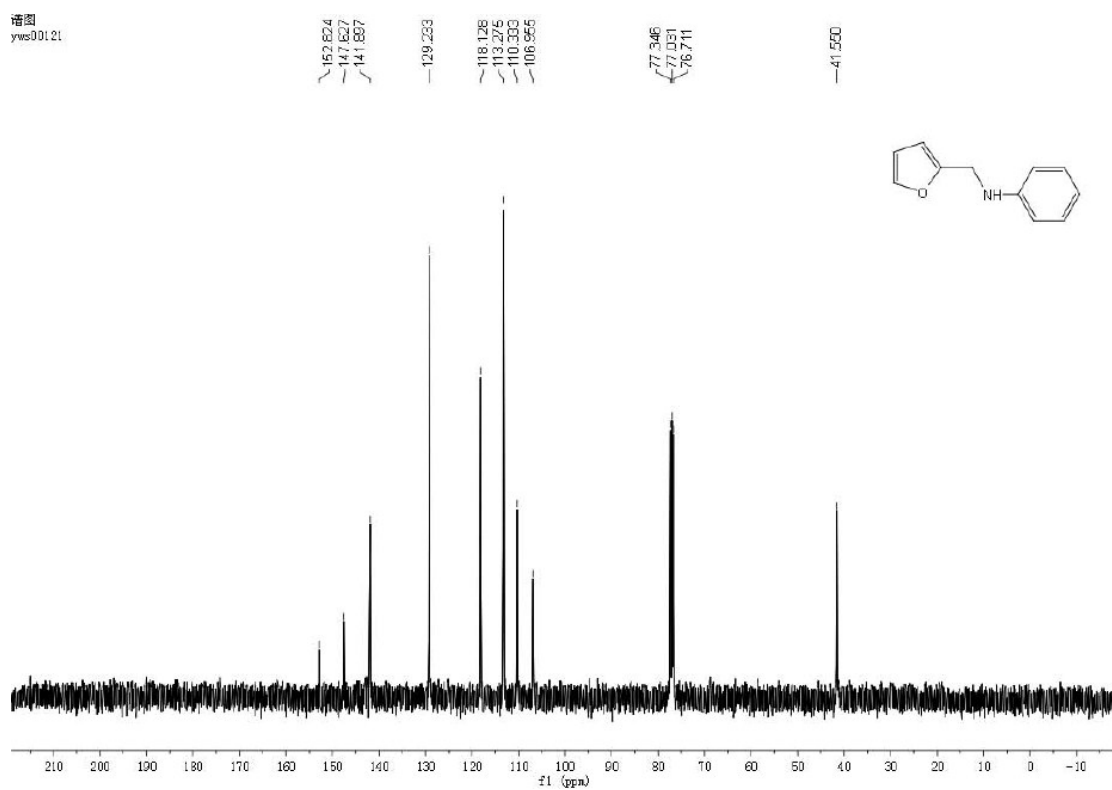

$^1\text{H}$  NMR and  $^{13}\text{C}$  NMR spectra for compound **3a'**

谱图  
yws00136

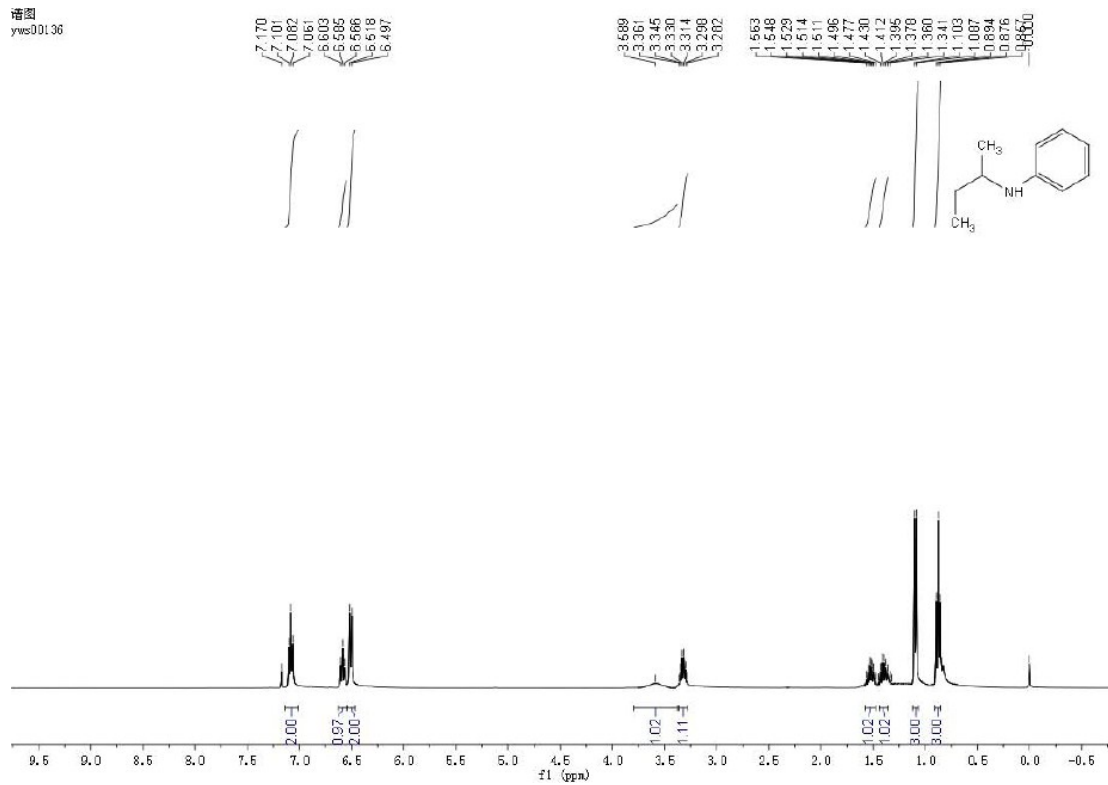

YN-136  
YN-136

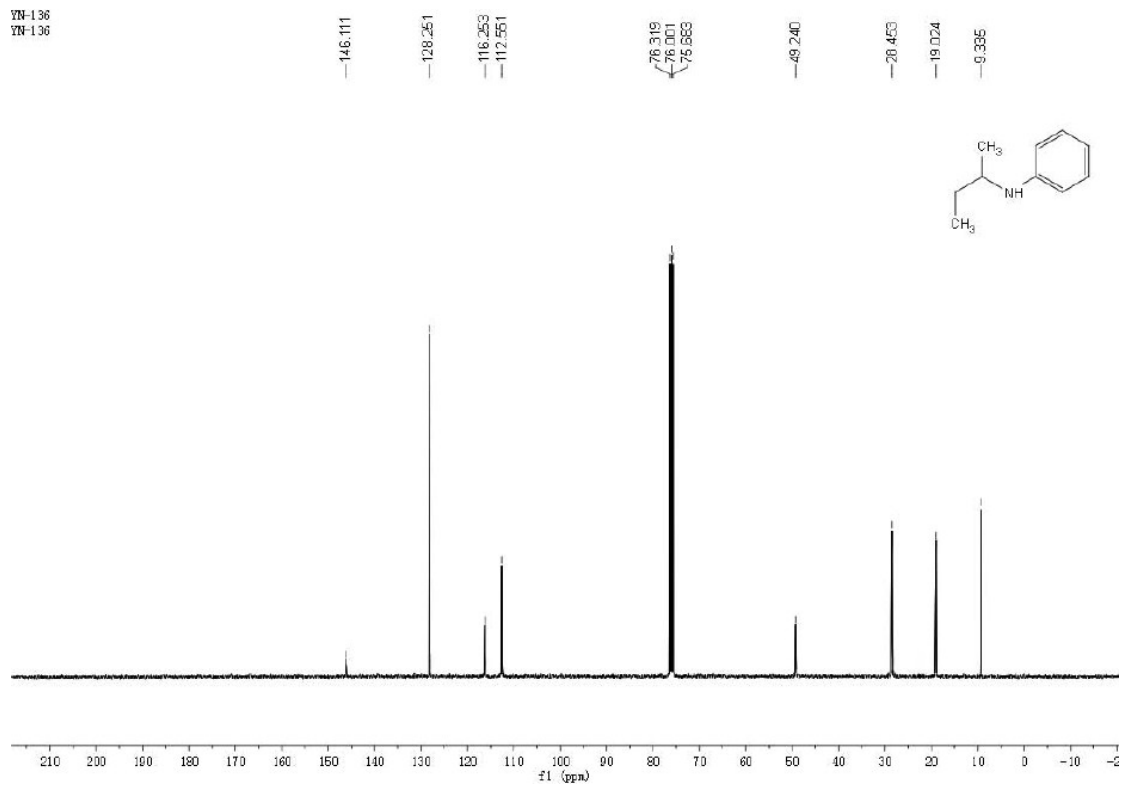

<sup>1</sup>H NMR and <sup>13</sup>C NMR spectra for compound **3b'**

谱图  
yws00136

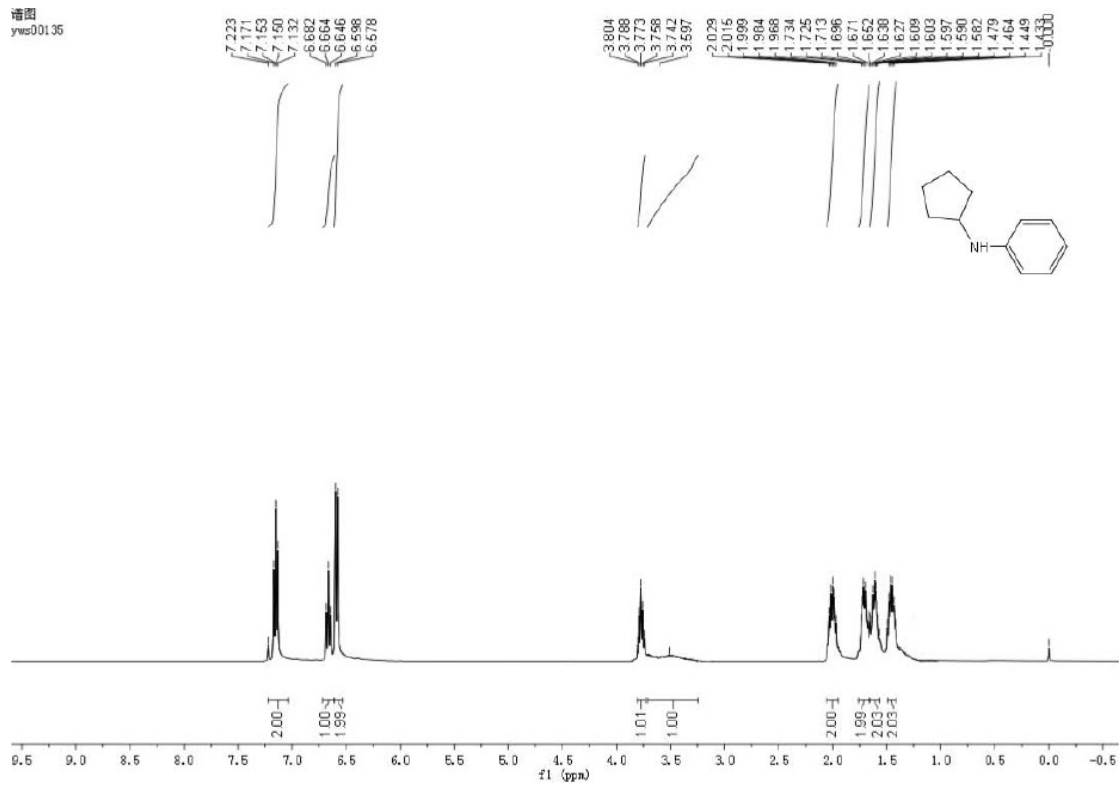

YN-136  
YN-136

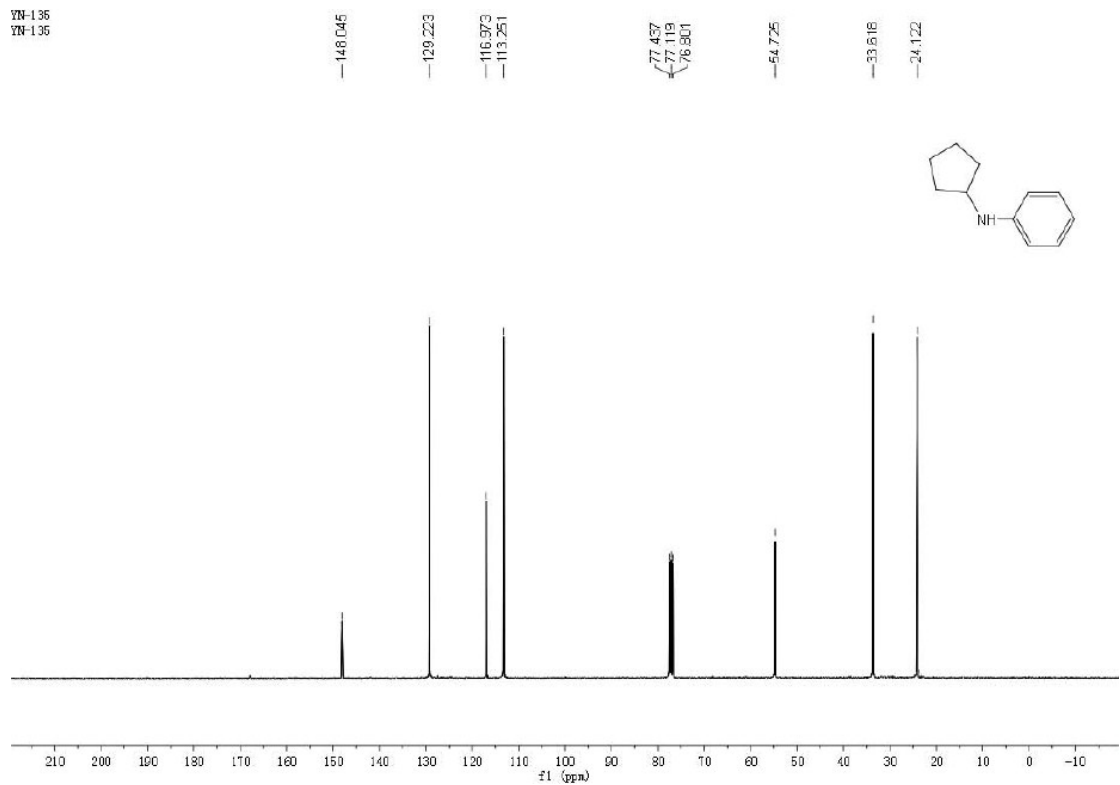

<sup>1</sup>H NMR and <sup>13</sup>C NMR spectra for compound 3c'

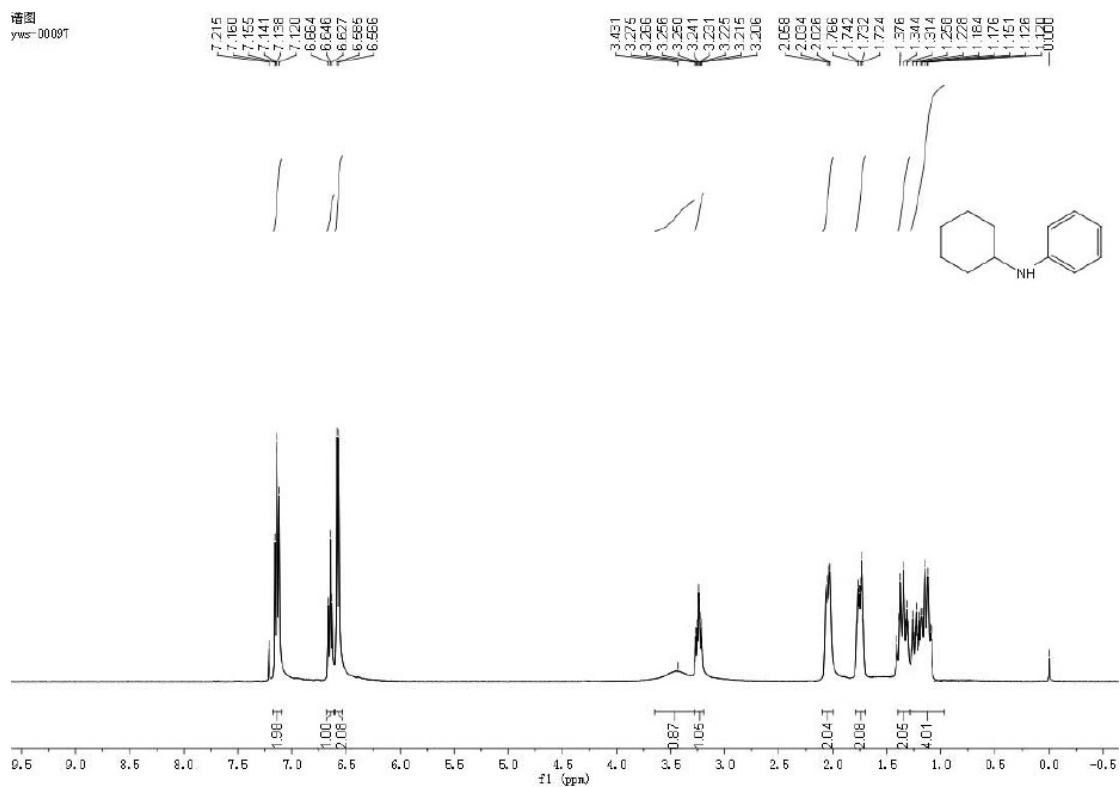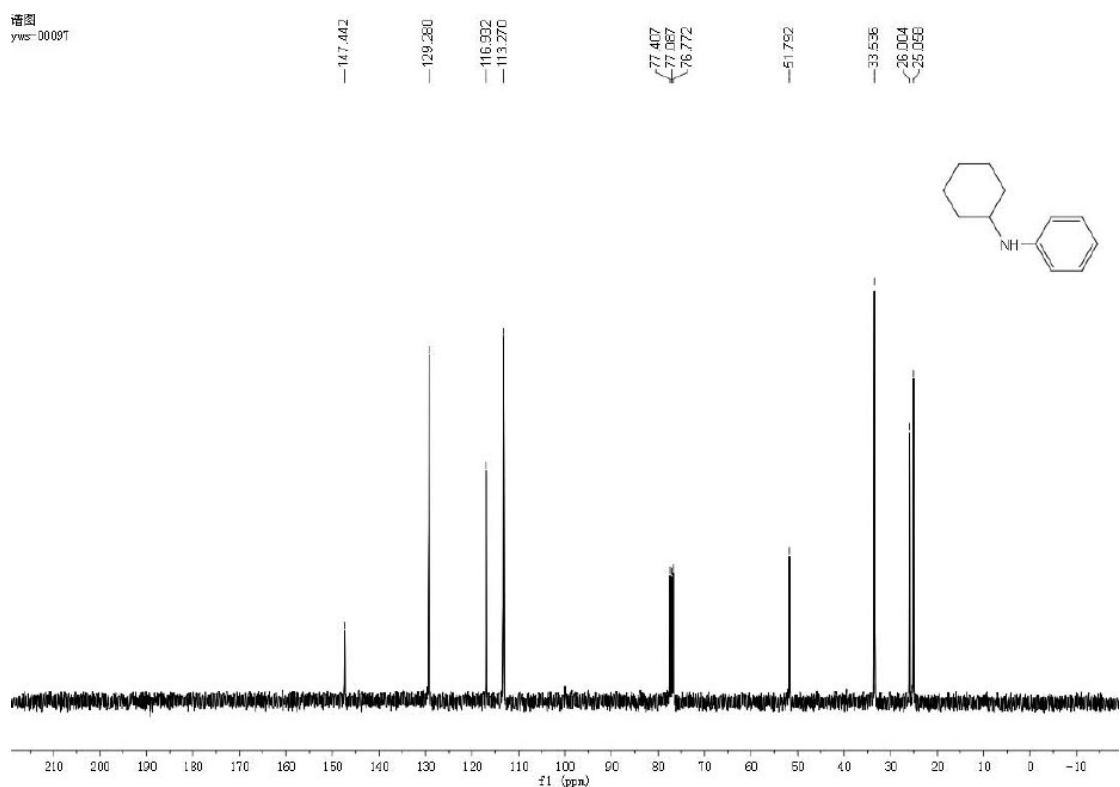

<sup>1</sup>H NMR and <sup>13</sup>C NMR spectra for compound **3d'**
